# Supplementary material for: The range of equitable climate finance contributions and recipient flows under the COP29 New Collective Quantified Goal
Source: Research Square preprint supplement (doi:10.21203/rs.3.rs-6050567/v1), 2025-03-26
Supplement: Supplementary file 1 [file 167766c24ef8b1d7ebaa6c79.xlsx]

## Sheet: Average
			Total Gross National Income	Total Gross National Income, accounting for debt	Total Gross National Income with per capita scaling	Total Gross National Income (PPP)	Total Gross National Income (PPP) with per capita scaling	Cumulative emissions since 1990	Cumulative emissions since 1850 scaled by per capita emissions	Cumulative emissions since 1990 scaled by per capita emissions	Average cumulative emissions since 1850 and since 1990	Average cumulative emissions since 1850 and since 1990 with per capita scaling	Cumulative emissions (average of 1850/1990) with total GNI	Cumulative emissions (average of 1850/1990) with total GNI (accounting for debt)	Cumulative emissions (average of 1850/1990) with total GNI (with per capita scaling)	Cumulative emissions (average of 1850/1990) with total GNI (PPP)	Cumulative emissions (average of 1850/1990) with total GNI (PPP with per capita scaling)	Cumulative emissions (average of 1850/1990 with per capita scaling) with total GNI	Cumulative emissions (average of 1850/1990 with per capita scaling) with total GNI (accounting for debt)	Cumulative emissions (average of 1850/1990 with per capita scaling) with total GNI (with per capita scaling)	Cumulative emissions (average of 1850/1990 with per capita scaling) with total GNI (PPP)	Cumulative emissions (average of 1850/1990 with per capita scaling) with total GNI (PPP with per capita scaling)
	Countries	ISO Code	Share	Share	Share	Share	Share	Share	Share	Share	Share	Share	Share	Share	Share	Share	Share	Share	Share	Share	Share	Share	Average	Contributions
	United States	USA	0.274335	0.276996	0.467494	0.196388	0.325292	0.325292	0.195095	0.420593	0.342427	0.227151	0.405811	0.250838	0.252169	0.347346	0.212054	0.276455	0.340168	0.341499	0.436676	0.301325	0.31077	93.231	United States
	Russian Federation	RUS	0.0199855	0.0195527	0.00573753	0.0383088	0.0286235	0.0286235	0.0523192	0.094451	0.0569481	0.0683432	0.0849507	0.0441715	0.0439549	0.037041	0.0534016	0.0485444	0.0524751	0.0522585	0.0453446	0.0616756	0.0468356	14.0507	Russian Federation
	China	CHN	0.1862	0.184246	0.0508627	0.214881	0.0919746	0.0919746	0.263439	0.0543781	0.147455	0.202381	0.0760785	0.194356	0.193378	0.126626	0.208904	0.14736	0.131203	0.130225	0.0634732	0.145608	0.14525	43.5751	China
	Germany	DEU	0.0506464	0.0511377	0.0633158	0.0445615	0.0665525	0.0665525	0.0311008	0.0605413	0.0345795	0.0414948	0.0538123	0.0460881	0.0463338	0.0524085	0.0430843	0.0540673	0.0522468	0.0524925	0.0585672	0.0492257	0.0509405	15.2821	Germany
	United Kingdom	GBR	0.0359987	0.0363479	0.0400089	0.029326	0.0360513	0.0360513	0.0204878	0.0595069	0.0187689	0.0347439	0.0471868	0.0353838	0.0355584	0.0373785	0.0320781	0.0354315	0.0416051	0.0417798	0.0435999	0.0382857	0.036779	11.0337	United Kingdom
	Australia	AUS	0.0173787	0.0175473	0.0240281	0.0118889	0.0152687	0.0152687	0.0175544	0.0339923	0.0355076	0.0186368	0.0349872	0.0180138	0.0180981	0.0213337	0.0152842	0.0169704	0.026189	0.0262733	0.0295089	0.0234551	0.0218592	6.55777	Australia
	Canada	CAN	0.0219716	0.0221848	0.0256704	0.017261	0.0215115	0.0215115	0.0212403	0.0341414	0.0347451	0.0227657	0.034894	0.0223763	0.0224829	0.0242194	0.0200407	0.0221605	0.0284404	0.028547	0.0302835	0.0260971	0.0251272	7.53817	Canada
	Brazil	BRA	0.022344	0.0216834	0.00480333	0.0284454	0.01057	0.01057	0.0542368	0.0312913	0.0409893	0.0530916	0.0343362	0.0377257	0.0373952	0.028948	0.0408266	0.0318767	0.0283478	0.0280172	0.0195701	0.0314155	0.0298242	8.94726	Brazil
	Japan	JPN	0.0652941	0.0659276	0.07055	0.0502858	0.0568159	0.0568159	0.0400127	0.0179033	0.0383712	0.0331366	0.0230063	0.0492379	0.0495547	0.0518469	0.0417631	0.0450116	0.0441726	0.0444894	0.0467816	0.0366776	0.0463827	13.9148	Japan
	Kazakhstan	KAZ	0.00202337	0.00179233	0.000432071	0.00401582	0.0023109	0.0023109	0.0110086	0.0154222	0.0185238	0.0111132	0.0165028	0.00656902	0.00645341	0.0057727	0.00757573	0.00672164	0.00926383	0.00914822	0.00846751	0.0102666	0.00778473	2.33542	Kazakhstan
	France	FRA	0.0348815	0.0352199	0.0370117	0.030647	0.0387933	0.0387933	0.0152274	0.0178616	0.0102156	0.0203059	0.0158809	0.0276057	0.027775	0.0286607	0.0255082	0.0295718	0.0253931	0.0255624	0.0264481	0.0232838	0.0267323	8.0197	France
	Poland	POL	0.00727421	0.00734478	0.00297429	0.0117128	0.0104704	0.0104704	0.0121168	0.0168787	0.0119521	0.0148748	0.0157469	0.0110771	0.0111124	0.00892477	0.0133119	0.0126865	0.0115131	0.0115484	0.00936075	0.0137405	0.0112546	3.37637	Poland
	Indonesia	IDN	0.0135305	0.0130351	0.00137208	0.0288857	0.00849075	0.00849075	0.038817	0.00734294	0.0163551	0.0317469	0.00956388	0.0226435	0.0223956	0.0165598	0.0303568	0.0201466	0.0115519	0.0113039	0.00546807	0.0192418	0.0168649	5.05948	Indonesia
	Italy	ITA	0.0255715	0.0258195	0.0229644	0.0248347	0.0294097	0.0294097	0.0153343	0.00759372	0.01196	0.0140782	0.00881284	0.0198336	0.0199577	0.0185224	0.0194801	0.0217596	0.0172009	0.017325	0.0158897	0.0168385	0.0191298	5.73894	Italy
	Czechia	CZE	0.00292955	0.00295797	0.00165911	0.00398059	0.00415911	0.00415911	0.00443653	0.00968044	0.00551092	0.00592693	0.00859834	0.00442927	0.00444348	0.00379313	0.00496064	0.00504854	0.00576497	0.00577918	0.00512883	0.00629416	0.00498204	1.49461	Czechia
	Belgium	BEL	0.00686457	0.00693117	0.00833106	0.00590924	0.00838237	0.00838237	0.00428256	0.00866262	0.00469615	0.00583229	0.00761434	0.00635081	0.00638412	0.0070821	0.00587849	0.00711333	0.00724182	0.00727513	0.00797311	0.00676709	0.00689774	2.06932	Belgium
	Saudi Arabia	SAU	0.0102658	0.0103654	0.00598888	0.0161161	0.0200405	0.0200405	0.0144254	0.00433812	0.0171267	0.00989613	0.00704643	0.0100845	0.0101343	0.00794284	0.0130222	0.0149793	0.00865965	0.00870946	0.00651795	0.0115913	0.0113646	3.40937	Saudi Arabia
	Netherlands	NLD	0.0114327	0.0115436	0.015275	0.00951114	0.0143543	0.0143543	0.00682541	0.00642525	0.00788505	0.00683761	0.00691791	0.00913909	0.00919456	0.0110571	0.00818468	0.0106036	0.00917922	0.00923469	0.0110972	0.00822133	0.00986368	2.95911	Netherlands
	South Africa	ZAF	0.004655	0.00442442	0.000748293	0.00728307	0.00248709	0.00248709	0.0154749	0.00523256	0.011977	0.0125453	0.00688132	0.00860179	0.00848641	0.00664688	0.00992817	0.00752701	0.00576977	0.00565439	0.00381486	0.00708792	0.00688566	2.0657	South Africa
	Korea, Rep.	KOR	0.0214751	0.0216834	0.0184875	0.0208717	0.0237112	0.0237112	0.0167347	0.00400659	0.0162596	0.0113893	0.00658394	0.0164396	0.0165438	0.0149394	0.0161501	0.017563	0.0140369	0.014141	0.0125366	0.01374	0.0160502	4.81507	Korea, Rep.
	Argentina	ARG	0.00628114	0.005941	0.00176642	0.00907081	0.00500196	0.00500196	0.0119084	0.00554622	0.00919565	0.0107427	0.00654217	0.00851412	0.00834391	0.00625469	0.0099201	0.00788198	0.00641382	0.00624362	0.0041544	0.00781297	0.0071269	2.13807	Argentina
	Mexico	MEX	0.0151443	0.0144138	0.00370634	0.0228091	0.0114156	0.0114156	0.0148827	0.00498109	0.00518409	0.0158215	0.00512179	0.0154881	0.0151226	0.00976416	0.0193395	0.0136333	0.0101382	0.00977271	0.00441426	0.0139781	0.0118273	3.5482	Mexico
	Qatar	QAT	0.00208544	0.00210567	0.00333189	0.00232495	0.00562279	0.00562279	0.00361688	0.00250884	0.0145152	0.00223094	0.00482782	0.00215891	0.00216903	0.00278158	0.00228093	0.00392948	0.00345735	0.00346747	0.00408002	0.00357906	0.00383485	1.15046	Qatar
	Romania	ROU	0.00306609	0.00309584	0.00102347	0.00570669	0.00481398	0.00481398	0.0035226	0.00524711	0.00195656	0.00557556	0.00428512	0.00432191	0.00433678	0.0032996	0.00564854	0.00520008	0.00367667	0.00369154	0.00265436	0.00500003	0.00404683	1.21405	Romania
	Thailand	THA	0.00599564	0.005753	0.00103708	0.0112725	0.00497747	0.00497747	0.0101359	0.00362949	0.00429267	0.0102888	0.00386678	0.00814433	0.00802291	0.00566304	0.0107947	0.00764241	0.00493327	0.00481185	0.00245199	0.00757629	0.00631338	1.89401	Thailand
	Spain	ESP	0.0172545	0.0174219	0.0128836	0.0177013	0.0184108	0.0184108	0.0097468	0.00305619	0.0059541	0.00832902	0.00380102	0.0127977	0.0128814	0.010607	0.0130306	0.0133793	0.0105337	0.0106174	0.00834293	0.0107609	0.011796	3.53881	Spain
	Paraguay	PRY	0.00047543	0.000448709	6.8961e-05	0.000813731	0.000274297	0.000274297	0.00318299	0.00312348	0.00447672	0.00301906	0.0035209	0.00174743	0.00173405	0.00154403	0.00191932	0.00164924	0.00199833	0.00198496	0.00179494	0.00216884	0.00181099	0.543296	Paraguay
	Colombia	COL	0.00389779	0.00369746	0.000605519	0.00720381	0.00280832	0.00280832	0.00751589	0.00325828	0.00326072	0.00810525	0.00331516	0.0060029	0.00590266	0.00435546	0.00766478	0.00546395	0.00360782	0.00350757	0.00196038	0.00526402	0.0045103	1.35309	Colombia
	United Arab Emirates	ARE	0.00511429	0.00516391	0.00573137	0.00620866	0.0114687	0.0114687	0.00553302	0.00172666	0.00971568	0.00343832	0.00327989	0.00427807	0.00430289	0.00458513	0.00482936	0.00745791	0.00419885	0.00422366	0.00450591	0.00474832	0.00559896	1.67969	United Arab Emirates
	Denmark	DNK	0.00466741	0.00471269	0.00763765	0.00339055	0.00547239	0.00547239	0.00227015	0.00289905	0.00261684	0.00254314	0.00287095	0.00360688	0.00362953	0.00509077	0.0029706	0.00401062	0.00377079	0.00379343	0.00525467	0.00313331	0.00399069	1.19721	Denmark
	Ireland	IRL	0.0040964	0.00413614	0.00676622	0.00330248	0.00597108	0.00597108	0.00221643	0.00274571	0.00286887	0.00235286	0.00282628	0.00322605	0.00324592	0.00455988	0.00283123	0.00416474	0.00346275	0.00348262	0.00479658	0.00306688	0.00380451	1.14135	Ireland
	Turkey	TUR	0.0105017	0.00992674	0.00268385	0.0221046	0.0161449	0.0161449	0.00971742	0.00253815	0.00332815	0.00950885	0.00278597	0.0100089	0.00972122	0.00609653	0.0158253	0.012837	0.00664742	0.00635973	0.00273504	0.0124568	0.00940366	2.8211	Turkey
	Belarus	BLR	0.000737352	0.000681836	0.000121845	0.00162922	0.000807698	0.000807698	0.00185365	0.00348787	0.00111525	0.00312568	0.0027722	0.00193178	0.001904	0.00162378	0.00238085	0.00196941	0.00175504	0.00172726	0.00144704	0.00220239	0.00170409	0.511228	Belarus
	New Zealand	NZL	0.00269369	0.00271983	0.00293147	0.00197268	0.00213468	0.00213468	0.00162428	0.00291136	0.00154372	0.00223147	0.00254714	0.00246352	0.00247659	0.00258162	0.0021049	0.00218523	0.00262134	0.00263441	0.00273945	0.00226168	0.00237569	0.712706	New Zealand
	Iceland	ISL	0.000296679	0.000299557	0.000476616	0.0001867	0.000256281	0.000256281	0.000431174	0.00264629	0.00145801	0.00058347	0.00233407	0.000440179	0.000441618	0.000530069	0.000385664	0.000420398	0.00131548	0.00131692	0.00140537	0.00126123	0.000837103	0.251131	Iceland
	Bulgaria	BGR	0.000845348	0.000853549	0.000228468	0.00156758	0.0010667	0.0010667	0.0016111	0.00256621	0.00120188	0.00232536	0.00218886	0.00158566	0.00158976	0.00127694	0.00194917	0.00169812	0.0015174	0.0015215	0.00120868	0.00187968	0.00148743	0.44623	Bulgaria
	Hungary	HUN	0.00196131	0.00198033	0.000825416	0.00295902	0.00255099	0.00255099	0.00214895	0.00244446	0.00143515	0.00283643	0.00218578	0.00239955	0.00240907	0.00183098	0.00290152	0.00269643	0.00207422	0.00208373	0.00150564	0.00257453	0.00221772	0.665317	Hungary
	Greece	GRC	0.00256956	0.00259449	0.00131324	0.00295902	0.00236457	0.00236457	0.00344984	0.00160682	0.00342834	0.00286119	0.00206158	0.00271627	0.00272874	0.00208729	0.00291393	0.00261559	0.00231645	0.00232892	0.00168748	0.00251239	0.00247401	0.742204	Greece
	Austria	AUT	0.005586	0.00564019	0.0071399	0.00477319	0.00707844	0.00707844	0.00222	0.00210518	0.00163327	0.00263223	0.00200732	0.00411104	0.00413814	0.00488642	0.00370721	0.00485848	0.00379858	0.00382568	0.00457396	0.0033932	0.00425934	1.2778	Austria
	Serbia	SRB	0.000628114	0.000577806	0.000122536	0.00117128	0.000578544	0.000578544	0.00176888	0.00208408	0.00140748	0.00221136	0.00192302	0.00141996	0.00139479	0.00116697	0.00169373	0.00139688	0.00127579	0.00125061	0.00102279	0.00154833	0.00126107	0.378322	Serbia
	Peru	PER	0.00261921	0.00253182	0.000417371	0.00364594	0.00109807	0.00109807	0.00533434	0.00159547	0.00250728	0.0049011	0.00185032	0.00376108	0.00371735	0.00265928	0.00427938	0.00300384	0.00223567	0.00219194	0.00113387	0.00275048	0.00266659	0.799978	Peru
	Kuwait	KWT	0.00182476	0.00184246	0.00161303	0.00221046	0.00321386	0.00321386	0.00231866	0.00101722	0.00377195	0.00162002	0.00160973	0.00172302	0.00173188	0.00161661	0.00191766	0.00241873	0.00171787	0.00172673	0.00161146	0.00191168	0.00203158	0.609475	Kuwait
	Slovak Republic	SVK	0.00131581	0.00132858	0.00065955	0.00163803	0.00138782	0.00138782	0.00129971	0.00179611	0.000931997	0.00180092	0.00156433	0.00155883	0.00156521	0.00123028	0.00172177	0.00159606	0.00144053	0.00144691	0.00111198	0.00160247	0.00141924	0.425771	Slovak Republic
	Trinidad and Tobago	TTO	0.000286748	0.00028953	0.000111165	0.000340816	0.000213225	0.000213225	0.00135549	0.000939645	0.00359766	0.000938226	0.00150683	0.000612591	0.000613982	0.000524706	0.000640471	0.00057654	0.000896889	0.00089828	0.000809005	0.000924472	0.000814474	0.244342	Trinidad and Tobago
	Finland	FIN	0.00345091	0.00348439	0.00443048	0.00265079	0.00354949	0.00354949	0.00143701	0.00159796	0.00111266	0.00177551	0.00148495	0.0026144	0.00263114	0.00310321	0.00221591	0.00266446	0.00246911	0.00248585	0.00295793	0.00206962	0.00258676	0.776029	Finland
	Iraq	IRQ	0.00254473	0.00253182	0.000301012	0.003734	0.000879993	0.000879993	0.0063026	0.00102755	0.00267424	0.00490464	0.00141577	0.00372559	0.00371912	0.00260287	0.00432523	0.00289654	0.00198113	0.00197466	0.000858411	0.00257714	0.00259285	0.777856	Iraq
	Norway	NOR	0.00548669	0.00553992	0.0114048	0.00391894	0.00790014	0.00790014	0.00112383	0.00166069	0.000692993	0.0016992	0.00138495	0.00359483	0.00362145	0.00655255	0.00281238	0.00480214	0.0034377	0.00346432	0.00639542	0.00265428	0.00430237	1.29071	Norway
	Estonia	EST	0.000384813	0.000388547	0.000226895	0.000464109	0.000448121	0.000448121	0.000564918	0.00133749	0.000708203	0.000776528	0.00116982	0.000580806	0.000582673	0.000501727	0.000621192	0.000613034	0.000777452	0.000779319	0.000698372	0.000817566	0.000644485	0.193346	Estonia
	Turkmenistan	TKM	0.000551152	0.000556499	9.77216e-05	0.000752085	0.000247066	0.000247066	0.00224936	0.000760197	0.00235737	0.00165796	0.00111964	0.00110476	0.00110743	0.000877856	0.00120677	0.000953936	0.000835587	0.000838261	0.000608688	0.000936585	0.0009533	0.28599	Turkmenistan
	Sweden	SWE	0.00733628	0.00740745	0.0106028	0.00548652	0.00805182	0.00805182	0.000580935	0.00173731	9.62911e-05	0.0021182	0.00111914	0.00472976	0.00476535	0.00636102	0.00380677	0.00508786	0.00423022	0.00426581	0.00586148	0.00330583	0.00475014	1.42504	Sweden
	Ecuador	ECU	0.00129099	0.00122329	0.000191527	0.00177013	0.000488908	0.000488908	0.00324464	0.000830224	0.00175219	0.0027006	0.00106118	0.00199625	0.00196238	0.00144609	0.00223848	0.00159708	0.00117653	0.00114265	0.000626363	0.00141685	0.00143226	0.429679	Ecuador
	Lithuania	LTU	0.000681492	0.000688103	0.000339464	0.000995148	0.000982829	0.000982829	0.000543209	0.00136047	0.000312368	0.00105275	0.00102566	0.00086736	0.000870666	0.000696129	0.00102531	0.0010188	0.000853812	0.000857118	0.000682581	0.00101121	0.000842366	0.25271	Lithuania
	Oman	OMN	0.00100796	0.00101774	0.000458862	0.00137383	0.00115742	0.00115742	0.00204068	0.00051066	0.00272399	0.00128652	0.000946473	0.00114759	0.00115248	0.000872721	0.00133191	0.0012232	0.000977564	0.000982455	0.000702691	0.00116112	0.00116167	0.3485	Oman
	Switzerland	CHE	0.00917345	0.00926245	0.0198258	0.00564504	0.0101936	0.0101936	0.00160397	0.000913696	0.000877841	0.00175585	0.000919647	0.0054678	0.0055123	0.0107918	0.00370463	0.00597757	0.00504969	0.00509419	0.0103737	0.00328536	0.0062811	1.88433	Switzerland
	Portugal	PRT	0.00292955	0.00295797	0.00170697	0.00334651	0.00302441	0.00302441	0.00211786	0.00076676	0.00129206	0.00190005	0.000909156	0.00241581	0.00243003	0.0018036	0.00262648	0.00246423	0.00192035	0.00193457	0.00130815	0.00212974	0.00215043	0.64513	Portugal
	Israel	ISR	0.00513912	0.00518898	0.0057145	0.00346981	0.00353706	0.00353706	0.00230366	0.000571047	0.00166303	0.00173098	0.00082085	0.00343681	0.00346175	0.00372302	0.00260351	0.00263594	0.00298174	0.00300668	0.00326795	0.00214726	0.00304704	0.914111	Israel
	Azerbaijan	AZE	0.000575978	0.000556499	6.79439e-05	0.00130338	0.0004724	0.0004724	0.00179636	0.000724568	0.00095716	0.00175321	0.000797053	0.0011648	0.00115505	0.000910591	0.00153039	0.00111434	0.000686714	0.000676966	0.000432503	0.0010511	0.00090997	0.272991	Azerbaijan
	Uruguay	URY	0.00072618	0.000733225	0.000318949	0.000701007	0.000403559	0.000403559	0.000821282	0.000727112	0.000590852	0.000956914	0.000701227	0.0008418	0.000845323	0.000637952	0.000830099	0.000681092	0.000713953	0.000717476	0.000510105	0.00070168	0.000678167	0.20345	Uruguay
	Georgia	GEO	0.000213509	0.000184246	2.54167e-05	0.000494932	0.000185441	0.000185441	0.000654779	0.000837842	0.000346207	0.000993952	0.000697424	0.000603809	0.000589167	0.000509691	0.000745512	0.000590554	0.000455541	0.000440899	0.000361423	0.000596641	0.000485621	0.145686	Georgia
	Bahrain	BHR	0.000441915	0.000446202	0.000274801	0.000648167	0.000802686	0.000802686	0.000880331	0.000432042	0.00157941	0.000617659	0.000679703	0.000529941	0.000532085	0.000446246	0.000633742	0.000710797	0.000560962	0.000563106	0.000477267	0.000664466	0.000636211	0.190863	Bahrain
	Cuba	CUB	0.0011954	0.001207	0.000263919	0	0	0	0.000773587	0.000868875	0.000160074	0.00164775	0.0006349	0.001422	0.0014278	0.000955857	0	0	0.000915562	0.000921361	0.000449423	0	0.000642175	0.192653	Cuba
	Brunei Darussalam	BRN	0.000166339	0.000167952	0.000127467	0.000253631	0.000402389	0.000402389	0.000429245	0.000376107	0.00122938	0.000311381	0.000565556	0.000238918	0.000239725	0.000219432	0.000282888	0.000357199	0.000366006	0.000366813	0.000346519	0.000409898	0.000362961	0.108888	Brunei Darussalam
	Bosnia and Herzegovina	BIH	0.000259439	0.000240648	4.31048e-05	0.000486125	0.000205486	0.000205486	0.000467465	0.000714597	0.000202682	0.000828622	0.000556736	0.000544123	0.000534721	0.00043587	0.000658301	0.000517775	0.000408177	0.000398775	0.000299924	0.000521844	0.000426495	0.127949	Bosnia and Herzegovina
	Moldova	MDA	0.000146477	0.000135365	1.74729e-05	0.000323203	0.000115506	0.000115506	0.000472084	0.00065807	0.000262861	0.000726546	0.000544292	0.000436566	0.000431005	0.000372014	0.000525638	0.00042165	0.000345436	0.000339875	0.000280884	0.000434078	0.000355227	0.106568	Moldova
	Luxembourg	LUX	0.000638045	0.000644235	0.00128958	0.000484364	0.00100907	0.00100907	0.00033953	0.000498083	0.000528888	0.000358321	0.000514956	0.000498403	0.000501499	0.000824014	0.000421875	0.000684128	0.00057672	0.000579815	0.000902331	0.000500059	0.000640149	0.192045	Luxembourg
	Croatia	HRV	0.000784522	0.000792134	0.000329824	0.00117128	0.000998213	0.000998213	0.000615288	0.0005346	0.000293826	0.000833418	0.000471279	0.000809243	0.00081305	0.000581642	0.00100361	0.000916647	0.00062817	0.000631976	0.000400568	0.000821995	0.000721475	0.216442	Croatia
	Latvia	LVA	0.00042826	0.000432415	0.000201798	0.000566265	0.00047904	0.00047904	0.000176363	0.000530106	4.95654e-05	0.000506793	0.000357802	0.000467676	0.000469754	0.000354308	0.000537226	0.000493405	0.000393178	0.000395256	0.00027981	0.000462422	0.000403024	0.120907	Latvia
	Malaysia	MYS	0.00436949	0.00441188	0.00116499	0.0081197	0.00546222	0.00546222	0.000577084	0.000549387	2.94305e-05	0.00213744	0.00035296	0.00325497	0.00327617	0.00165128	0.00513426	0.00380235	0.00236272	0.00238392	0.00075903	0.00424035	0.00297509	0.892528	Malaysia
	Singapore	SGP	0.00413364	0.00417374	0.00626679	0.00462347	0.010645	0.010645	0.00130705	0.000188129	0.000907449	0.000847099	0.000333218	0.00249179	0.00251184	0.00355725	0.00273822	0.00574819	0.00223484	0.0022549	0.0033003	0.00248068	0.00356943	1.07083	Singapore
	Costa Rica	CRI	0.000760937	0.000719438	0.000231221	0.000951114	0.000490484	0.000490484	0.000672995	0.000299786	0.000261947	0.0007631	0.000294423	0.000762283	0.000741517	0.000497175	0.000858203	0.000627496	0.000527941	0.000507175	0.000262834	0.000623321	0.000567194	0.170158	Costa Rica
	Slovenia	SVN	0.000676526	0.00068309	0.00044869	0.000782027	0.00081405	0.00081405	0.000442925	0.000252704	0.000278547	0.00046115	0.000263962	0.000569072	0.000572354	0.000454944	0.000622351	0.000638094	0.000470476	0.000473758	0.000356348	0.000523456	0.000529929	0.158979	Slovenia
	North Macedonia	MKD	0.000150201	0.000136618	2.26537e-05	0.00031968	0.000139333	0.000139333	0.000341919	0.000281053	0.00017002	0.000446064	0.000252968	0.000298186	0.00029139	0.000234362	0.000383399	0.00029309	0.000201637	0.00019484	0.000137813	0.00028656	0.000236056	0.0708168	North Macedonia
	Chile	CHL	0.00340125	0.00343425	0.0012209	0.00432405	0.00267926	0.00267926	0.000896998	0.000296989	0.000122984	0.00136046	0.000247316	0.00238202	0.00239853	0.00129074	0.00284547	0.00202135	0.00182545	0.00184195	0.000734167	0.00228784	0.00191456	0.574369	Chile
	Jamaica	JAM	0.000183717	0.000160432	2.46702e-05	0.000254511	6.4286e-05	6.4286e-05	0.000457295	0.000136409	0.000221374	0.000415554	0.000159811	0.000299701	0.00028805	0.000220115	0.000335503	0.000240276	0.000171827	0.000160176	9.22423e-05	0.000207335	0.000207879	0.0623636	Jamaica
	Armenia	ARM	0.000166339	0.000149152	2.05874e-05	0.000368117	0.000136904	0.000136904	0.000322838	0.000171545	0.000112317	0.000408445	0.000157167	0.000287451	0.000278851	0.000214519	0.0003888	0.000273034	0.00016181	0.00015321	8.88784e-05	0.000262869	0.000212987	0.063896	Armenia
	Belize	BLZ	2.80541e-05	2.61956e-05	4.01974e-06	3.0559e-05	6.47607e-06	6.47607e-06	0.000196036	0.000101514	0.000284274	0.000149098	0.000143757	8.85867e-05	8.76567e-05	7.65601e-05	8.99682e-05	7.7913e-05	8.59157e-05	8.49857e-05	7.38891e-05	8.72193e-05	8.64577e-05	0.0259373	Belize
	Dominican Republic	DOM	0.00106506	0.00101523	0.000209504	0.00176132	0.000777946	0.000777946	0.000647331	0.000142828	0.000112087	0.000764215	0.000136569	0.000915008	0.000890074	0.000486874	0.00126426	0.000771824	0.000601181	0.000576247	0.000173047	0.000949837	0.00070192	0.210576	Dominican Republic
	El Salvador	SLV	0.000319023	0.00029329	3.32057e-05	0.000498454	0.000110065	0.000110065	0.000586507	0.00011775	0.000162546	0.00056364	0.000131236	0.000441443	0.000428568	0.000298427	0.000531759	0.000337339	0.000225239	0.000212363	8.22228e-05	0.000315127	0.000289914	0.0869741	El Salvador
	Barbados	BRB	6.03288e-05	6.09141e-05	2.66968e-05	3.8573e-05	1.48186e-05	1.48186e-05	0.000143449	7.8657e-05	0.000218607	0.000109359	0.000111071	8.48652e-05	8.51579e-05	6.80299e-05	7.40762e-05	6.21824e-05	8.57207e-05	8.60134e-05	6.88854e-05	7.48764e-05	7.8355e-05	0.0235065	Barbados
	Equatorial Guinea	GNQ	0.000105637	0.000106662	1.38222e-05	0.000178774	5.37506e-05	5.37506e-05	0.000420744	5.29974e-05	0.00031757	0.000257116	0.000103677	0.000181414	0.000181927	0.000135471	0.000218247	0.000155656	0.000104694	0.000105206	5.87505e-05	0.000141345	0.000147361	0.0442082	Equatorial Guinea
	Albania	ALB	0.000191165	0.000176726	2.71915e-05	0.000374281	0.000141527	0.000141527	0.000331713	9.53311e-05	0.000118577	0.000330717	0.00010304	0.000261008	0.000253783	0.000178957	0.000352956	0.000236418	0.000147168	0.000139943	6.51173e-05	0.000238874	0.000195301	0.0585903	Albania
	Montenegro	MNE	6.76526e-05	5.53992e-05	1.53442e-05	0.000128577	7.52537e-05	7.52537e-05	5.61424e-05	0.00014293	1.53044e-05	0.000151816	9.78343e-05	0.000109758	0.000103627	8.35818e-05	0.000140385	0.000113672	8.27668e-05	7.66358e-05	5.65902e-05	0.000113299	8.80912e-05	0.0264274	Montenegro
	Guatemala	GTM	0.000966998	0.000937525	0.000111163	0.00133861	0.000289231	0.000289231	0.00033302	0.000134679	1.90947e-05	0.000795164	9.51708e-05	0.000881416	0.000866667	0.000453173	0.00106819	0.000542902	0.000531415	0.000516666	0.000103173	0.000717563	0.000549553	0.164866	Guatemala
	Bahamas, The	BHS	0.000142753	0.000144138	0.000102813	0.000117128	9.39781e-05	9.39781e-05	0.000140141	6.83888e-05	0.000143506	0.000116863	8.72393e-05	0.000129858	0.00013055	0.000109844	0.00011715	0.000105531	0.000115045	0.000115738	9.50312e-05	0.000102268	0.000113597	0.0340791	Bahamas, The
	Cyprus	CYP	0.000310333	0.000313344	0.00015937	0.000329367	0.000243748	0.000243748	0.000258012	6.30067e-05	0.000159548	0.000202526	8.59392e-05	0.000256537	0.000258043	0.000180957	0.000266275	0.000223339	0.000198243	0.000199748	0.000122662	0.000207839	0.000214129	0.0642388	Cyprus
	Suriname	SUR	3.93503e-05	3.37158e-05	5.18282e-06	8.33986e-05	3.16096e-05	3.16096e-05	0.000135433	4.45482e-05	8.89163e-05	0.00011481	5.58611e-05	7.70942e-05	7.42749e-05	5.99972e-05	9.92405e-05	7.33101e-05	4.76193e-05	4.48e-05	3.05223e-05	6.9688e-05	6.20491e-05	0.0186147	Suriname
	Malta	MLT	0.000179993	0.00018174	0.000126205	0.00019903	0.000209522	0.000209522	8.66946e-05	1.21238e-05	4.24043e-05	6.16279e-05	1.87326e-05	0.000120872	0.000121746	9.39229e-05	0.000130476	0.000135655	9.94246e-05	0.000100298	7.24749e-05	0.000108983	0.000115572	0.0346717	Malta
	Mauritius	MUS	0.000172545	0.000152912	4.88759e-05	0.000272124	0.000165065	0.000165065	0.000120769	8.9683e-06	3.46783e-05	8.33518e-05	1.4441e-05	0.000128008	0.000118184	6.61166e-05	0.000177939	0.0001243	9.35522e-05	8.37284e-05	3.16608e-05	0.000143418	0.000110285	0.0330855	Mauritius
	Panama	PAN	0.000779557	0.00078712	0.000285047	0.00118009	0.000886908	0.000886908	0	4.18512e-05	0	0.000120092	8.56506e-06	0.000450092	0.000453874	0.000202584	0.000650757	0.000503719	0.000394328	0.00039811	0.00014682	0.000594896	0.000438566	0.13157	Panama
	Antigua and Barbuda	ATG	1.93648e-05	1.95527e-05	8.26956e-06	1.81416e-05	9.8546e-06	9.8546e-06	2.10648e-05	6.04528e-06	1.41721e-05	1.69461e-05	8.01822e-06	1.81622e-05	1.82561e-05	1.26083e-05	1.75668e-05	1.34159e-05	1.36982e-05	1.37921e-05	8.1443e-06	1.30912e-05	1.4001e-05	0.00420029	Antigua and Barbuda
	Palau	PLW	3.42608e-06	3.45932e-06	1.34145e-06	2.8005e-06	1.21698e-06	1.21698e-06	7.52376e-06	4.82713e-06	9.3694e-06	6.43727e-06	5.99604e-06	4.93288e-06	4.94951e-06	3.88946e-06	4.62563e-06	3.83268e-06	4.71225e-06	4.72887e-06	3.66882e-06	4.40155e-06	4.36783e-06	0.00131035	Palau
	Andorra	AND	4.2826e-05	4.32415e-05	4.75413e-05	0	0	0	1.16384e-05	5.68347e-06	5.08514e-06	1.30807e-05	5.61564e-06	2.79681e-05	2.81758e-05	3.03133e-05	0	0	2.42355e-05	2.44432e-05	2.65807e-05	0	1.68214e-05	0.00504643	Andorra
	Liechtenstein	LIE	0	0	0	0	0	0	7.6532e-06	3.44392e-06	4.46492e-06	7.51897e-06	3.76759e-06	0	0	0	0	0	0	0	0	0	1.34243e-06	0.000402729	Liechtenstein
	St. Kitts and Nevis	KNA	1.2103e-05	1.22204e-05	6.35224e-06	1.24173e-05	9.07878e-06	9.07878e-06	7.70323e-06	2.90479e-06	3.7269e-06	7.59609e-06	3.16811e-06	9.85372e-06	9.91244e-06	6.9745e-06	1.0019e-05	8.345e-06	7.6397e-06	7.69842e-06	4.76048e-06	7.79971e-06	7.96763e-06	0.00239029	St. Kitts and Nevis
	San Marino	SMR	1.81235e-05	1.82993e-05	2.0161e-05	1.68206e-05	2.358e-05	2.358e-05	7.37436e-06	2.24208e-06	4.83437e-06	6.09513e-06	2.88719e-06	1.21155e-05	1.22035e-05	1.3129e-05	1.14711e-05	1.48458e-05	1.05115e-05	1.05995e-05	1.1525e-05	9.86293e-06	1.25131e-05	0.00375392	San Marino
	Seychelles	SYC	1.81235e-05	1.82993e-05	5.66188e-06	2.50989e-05	1.4744e-05	1.4744e-05	1.47911e-05	1.12409e-06	5.46188e-06	9.56675e-06	1.9975e-06	1.38514e-05	1.39393e-05	7.61463e-06	1.73529e-05	1.21654e-05	1.00667e-05	1.01546e-05	3.82996e-06	1.35609e-05	1.16074e-05	0.00348223	Seychelles
	Maldives	MDV	5.89633e-05	5.47725e-05	1.37243e-05	8.24299e-05	3.6419e-05	3.6419e-05	3.32938e-05	9.17788e-07	6.33747e-06	1.96098e-05	1.922e-06	3.93068e-05	3.72099e-05	1.66678e-05	5.10759e-05	2.80357e-05	3.04628e-05	2.83659e-05	7.82383e-06	4.22162e-05	3.12987e-05	0.00938961	Maldives
	Grenada	GRD	1.3034e-05	1.21577e-05	2.81128e-06	1.52354e-05	5.21542e-06	5.21542e-06	1.07358e-05	8.39371e-07	2.76235e-06	7.77198e-06	1.26559e-06	1.04075e-05	9.96903e-06	5.29181e-06	1.15175e-05	6.5009e-06	7.15425e-06	6.7158e-06	2.03857e-06	8.25825e-06	7.2449e-06	0.00217347	Grenada
	St. Lucia	LCA	2.35853e-05	2.25608e-05	6.3925e-06	2.29853e-05	8.24358e-06	8.24358e-06	1.25014e-05	6.73671e-07	2.60114e-06	8.63183e-06	1.08411e-06	1.61167e-05	1.5604e-05	7.51251e-06	1.58268e-05	8.44603e-06	1.23428e-05	1.18301e-05	3.73861e-06	1.20461e-05	1.10483e-05	0.0033145	St. Lucia
	Monaco	MCO	0	0	0	0	0	0	3.05093e-06	1.05429e-06	7.63996e-07	3.71249e-06	9.88957e-07	0	0	0	0	0	0	0	0	0	4.78533e-07	0.00014356	Monaco
	St. Vincent and the Grenadines	VCT	1.09858e-05	1.04281e-05	2.40043e-06	1.36503e-05	5.03196e-06	5.03196e-06	7.34623e-06	6.99454e-07	1.55459e-06	6.01237e-06	9.10326e-07	8.50287e-06	8.2238e-06	4.20655e-06	9.84291e-06	5.52787e-06	5.95182e-06	5.67275e-06	1.65549e-06	7.28715e-06	6.04613e-06	0.00181384	St. Vincent and the Grenadines
	Marshall Islands	MHL	3.46332e-06	3.49692e-06	5.96418e-07	2.69482e-06	4.90294e-07	4.90294e-07	4.89608e-06	3.94741e-07	1.72633e-06	3.26166e-06	6.69765e-07	3.36369e-06	3.38049e-06	1.92908e-06	2.98227e-06	1.87877e-06	2.06773e-06	2.08453e-06	6.33121e-07	1.68381e-06	2.10921e-06	0.000632762	Marshall Islands
	Fiji	FJI	5.89633e-05	5.69033e-05	7.73286e-06	9.86341e-05	2.93806e-05	2.93806e-05	0	8.05761e-07	0	9.02494e-06	2.29374e-07	3.40143e-05	3.29835e-05	8.37932e-06	5.38845e-05	1.92142e-05	2.96165e-05	2.85856e-05	3.98148e-06	4.94792e-05	2.75597e-05	0.0082679	Fiji
	Nauru	NRU	2.33371e-06	2.35635e-06	8.87049e-07	1.77013e-06	6.9294e-07	6.9294e-07	1.27395e-06	1.76605e-07	3.82842e-07	1.05112e-06	2.27845e-07	1.69322e-06	1.70454e-06	9.69132e-07	1.41236e-06	8.73002e-07	1.28157e-06	1.2929e-06	5.5749e-07	9.99912e-07	1.13148e-06	0.000339444	Nauru
	Tuvalu	TUV	8.82588e-07	8.9115e-07	1.42592e-07	6.43764e-07	1.03006e-07	1.03006e-07	5.87836e-07	3.27465e-08	9.16123e-08	4.47224e-07	4.63565e-08	6.6521e-07	6.69492e-07	2.94917e-07	5.46178e-07	2.75503e-07	4.64774e-07	4.69056e-07	9.44813e-08	3.45385e-07	3.89844e-07	0.000116953	Tuvalu
	Botswana	BWA	0.00020482	0.0002043	3.2995e-05	0.000336413	0.000120859	0.000120859	0	6.04558e-06	0	5.27126e-06	2.76702e-08	0.000105116	0.000104855	1.91347e-05	0.000171008	6.30856e-05	0.000102494	0.000102233	1.65129e-05	0.000168382	9.42206e-05	0.0282662	Botswana
	Marshall Islands	MHL	3.46332e-06	3.49692e-06	5.96418e-07	2.69482e-06	4.90294e-07	4.90294e-07	4.89608e-06	3.94741e-07	1.72633e-06	3.26166e-06	6.69765e-07	3.36369e-06	3.38049e-06	1.92908e-06	2.98227e-06	1.87877e-06	2.06773e-06	2.08453e-06	6.33121e-07	1.68381e-06	2.10921e-06	0.000632762	Marshall Islands
	Tuvalu	TUV	8.82588e-07	8.9115e-07	1.42592e-07	6.43764e-07	1.03006e-07	1.03006e-07	5.87836e-07	3.27465e-08	9.16123e-08	4.47224e-07	4.63565e-08	6.6521e-07	6.69492e-07	2.94917e-07	5.46178e-07	2.75503e-07	4.64774e-07	4.69056e-07	9.44813e-08	3.45385e-07	3.89844e-07	0.000116953	Tuvalu
		Sum	0.999321	0.999326	0.999906	0.999042	0.999734	0.999734	1.00001	1	1	1	1	1	1	1	1	1	1	1	1	1

## Sheet: Economic
			Assumptions
			Total GNI	Total GNI (debt)	Total GNI per capita scaled	Total GNI (PPP)	Total GNI (PPP) per capita scaled
	Description		Total Gross National Income	Total Gross National Income, accounting for debt	Total Gross National Income with per capita scaling	Total Gross National Income (PPP)	Total Gross National Income (PPP) with per capita scaling
	Countries	ISO Code	Share	Share	Share	Share	Share	Average
	United States	USA	0.274335	0.276996	0.467494	0.196388	0.325292	0.308101
	Russian Federation	RUS	0.0199855	0.0195527	0.00573753	0.0383088	0.0286235	0.0224416
	China	CHN	0.1862	0.184246	0.0508627	0.214881	0.0919746	0.145633
	Germany	DEU	0.0506464	0.0511377	0.0633158	0.0445615	0.0665525	0.0552428
	United Kingdom	GBR	0.0359987	0.0363479	0.0400089	0.029326	0.0360513	0.0355466
	Australia	AUS	0.0173787	0.0175473	0.0240281	0.0118889	0.0152687	0.0172223
	Canada	CAN	0.0219716	0.0221848	0.0256704	0.017261	0.0215115	0.0217198
	Brazil	BRA	0.022344	0.0216834	0.00480333	0.0284454	0.01057	0.0175692
	Japan	JPN	0.0652941	0.0659276	0.07055	0.0502858	0.0568159	0.0617747
	Kazakhstan	KAZ	0.00202337	0.00179233	0.000432071	0.00401582	0.0023109	0.0021149
	France	FRA	0.0348815	0.0352199	0.0370117	0.030647	0.0387933	0.0353107
	Poland	POL	0.00727421	0.00734478	0.00297429	0.0117128	0.0104704	0.00795529
	Indonesia	IDN	0.0135305	0.0130351	0.00137208	0.0288857	0.00849075	0.0130628
	Italy	ITA	0.0255715	0.0258195	0.0229644	0.0248347	0.0294097	0.0257199
	Czechia	CZE	0.00292955	0.00295797	0.00165911	0.00398059	0.00415911	0.00313727
	Belgium	BEL	0.00686457	0.00693117	0.00833106	0.00590924	0.00838237	0.00728368
	Saudi Arabia	SAU	0.0102658	0.0103654	0.00598888	0.0161161	0.0200405	0.0125553
	Netherlands	NLD	0.0114327	0.0115436	0.015275	0.00951114	0.0143543	0.0124233
	South Africa	ZAF	0.004655	0.00442442	0.000748293	0.00728307	0.00248709	0.00391957
	Korea, Rep.	KOR	0.0214751	0.0216834	0.0184875	0.0208717	0.0237112	0.0212458
	Argentina	ARG	0.00628114	0.005941	0.00176642	0.00907081	0.00500196	0.00561227
	Mexico	MEX	0.0151443	0.0144138	0.00370634	0.0228091	0.0114156	0.0134978
	Qatar	QAT	0.00208544	0.00210567	0.00333189	0.00232495	0.00562279	0.00309415
	Romania	ROU	0.00306609	0.00309584	0.00102347	0.00570669	0.00481398	0.00354121
	Thailand	THA	0.00599564	0.005753	0.00103708	0.0112725	0.00497747	0.00580713
	Spain	ESP	0.0172545	0.0174219	0.0128836	0.0177013	0.0184108	0.0167344
	Paraguay	PRY	0.00047543	0.000448709	6.8961e-05	0.000813731	0.000274297	0.000416226
	Colombia	COL	0.00389779	0.00369746	0.000605519	0.00720381	0.00280832	0.00364258
	United Arab Emirates	ARE	0.00511429	0.00516391	0.00573137	0.00620866	0.0114687	0.00673738
	Denmark	DNK	0.00466741	0.00471269	0.00763765	0.00339055	0.00547239	0.00517614
	Ireland	IRL	0.0040964	0.00413614	0.00676622	0.00330248	0.00597108	0.00485446
	Turkey	TUR	0.0105017	0.00992674	0.00268385	0.0221046	0.0161449	0.0122724
	Belarus	BLR	0.000737352	0.000681836	0.000121845	0.00162922	0.000807698	0.000795591
	New Zealand	NZL	0.00269369	0.00271983	0.00293147	0.00197268	0.00213468	0.00249047
	Iceland	ISL	0.000296679	0.000299557	0.000476616	0.0001867	0.000256281	0.000303166
	Bulgaria	BGR	0.000845348	0.000853549	0.000228468	0.00156758	0.0010667	0.000912329
	Hungary	HUN	0.00196131	0.00198033	0.000825416	0.00295902	0.00255099	0.00205541
	Greece	GRC	0.00256956	0.00259449	0.00131324	0.00295902	0.00236457	0.00236018
	Austria	AUT	0.005586	0.00564019	0.0071399	0.00477319	0.00707844	0.00604354
	Serbia	SRB	0.000628114	0.000577806	0.000122536	0.00117128	0.000578544	0.000615656
	Peru	PER	0.00261921	0.00253182	0.000417371	0.00364594	0.00109807	0.00206248
	Kuwait	KWT	0.00182476	0.00184246	0.00161303	0.00221046	0.00321386	0.00214091
	Slovak Republic	SVK	0.00131581	0.00132858	0.00065955	0.00163803	0.00138782	0.00126596
	Trinidad and Tobago	TTO	0.000286748	0.00028953	0.000111165	0.000340816	0.000213225	0.000248297
	Finland	FIN	0.00345091	0.00348439	0.00443048	0.00265079	0.00354949	0.00351321
	Iraq	IRQ	0.00254473	0.00253182	0.000301012	0.003734	0.000879993	0.00199831
	Norway	NOR	0.00548669	0.00553992	0.0114048	0.00391894	0.00790014	0.0068501
	Estonia	EST	0.000384813	0.000388547	0.000226895	0.000464109	0.000448121	0.000382497
	Turkmenistan	TKM	0.000551152	0.000556499	9.77216e-05	0.000752085	0.000247066	0.000440905
	Sweden	SWE	0.00733628	0.00740745	0.0106028	0.00548652	0.00805182	0.00777698
	Ecuador	ECU	0.00129099	0.00122329	0.000191527	0.00177013	0.000488908	0.000992969
	Lithuania	LTU	0.000681492	0.000688103	0.000339464	0.000995148	0.000982829	0.000737407
	Oman	OMN	0.00100796	0.00101774	0.000458862	0.00137383	0.00115742	0.00100316
	Switzerland	CHE	0.00917345	0.00926245	0.0198258	0.00564504	0.0101936	0.0108201
	Portugal	PRT	0.00292955	0.00295797	0.00170697	0.00334651	0.00302441	0.00279308
	Israel	ISR	0.00513912	0.00518898	0.0057145	0.00346981	0.00353706	0.00460989
	Azerbaijan	AZE	0.000575978	0.000556499	6.79439e-05	0.00130338	0.0004724	0.00059524
	Uruguay	URY	0.00072618	0.000733225	0.000318949	0.000701007	0.000403559	0.000576584
	Georgia	GEO	0.000213509	0.000184246	2.54167e-05	0.000494932	0.000185441	0.000220709
	Bahrain	BHR	0.000441915	0.000446202	0.000274801	0.000648167	0.000802686	0.000522754
	Cuba	CUB	0.0011954	0.001207	0.000263919	#N/A	#N/A	#N/A
	Brunei Darussalam	BRN	0.000166339	0.000167952	0.000127467	0.000253631	0.000402389	0.000223556
	Bosnia and Herzegovina	BIH	0.000259439	0.000240648	4.31048e-05	0.000486125	0.000205486	0.000246961
	Moldova	MDA	0.000146477	0.000135365	1.74729e-05	0.000323203	0.000115506	0.000147605
	Luxembourg	LUX	0.000638045	0.000644235	0.00128958	0.000484364	0.00100907	0.000813058
	Croatia	HRV	0.000784522	0.000792134	0.000329824	0.00117128	0.000998213	0.000815195
	Latvia	LVA	0.00042826	0.000432415	0.000201798	0.000566265	0.00047904	0.000421555
	Malaysia	MYS	0.00436949	0.00441188	0.00116499	0.0081197	0.00546222	0.00470566
	Singapore	SGP	0.00413364	0.00417374	0.00626679	0.00462347	0.010645	0.00596854
	Costa Rica	CRI	0.000760937	0.000719438	0.000231221	0.000951114	0.000490484	0.000630639
	Slovenia	SVN	0.000676526	0.00068309	0.00044869	0.000782027	0.00081405	0.000680877
	North Macedonia	MKD	0.000150201	0.000136618	2.26537e-05	0.00031968	0.000139333	0.000153697
	Chile	CHL	0.00340125	0.00343425	0.0012209	0.00432405	0.00267926	0.00301194
	Jamaica	JAM	0.000183717	0.000160432	2.46702e-05	0.000254511	6.4286e-05	0.000137523
	Armenia	ARM	0.000166339	0.000149152	2.05874e-05	0.000368117	0.000136904	0.00016822
	Belize	BLZ	2.80541e-05	2.61956e-05	4.01974e-06	3.0559e-05	6.47607e-06	1.90609e-05
	Dominican Republic	DOM	0.00106506	0.00101523	0.000209504	0.00176132	0.000777946	0.000965814
	El Salvador	SLV	0.000319023	0.00029329	3.32057e-05	0.000498454	0.000110065	0.000250808
	Barbados	BRB	6.03288e-05	6.09141e-05	2.66968e-05	3.8573e-05	1.48186e-05	4.02662e-05
	Equatorial Guinea	GNQ	0.000105637	0.000106662	1.38222e-05	0.000178774	5.37506e-05	9.17294e-05
	Albania	ALB	0.000191165	0.000176726	2.71915e-05	0.000374281	0.000141527	0.000182178
	Montenegro	MNE	6.76526e-05	5.53992e-05	1.53442e-05	0.000128577	7.52537e-05	6.84453e-05
	Guatemala	GTM	0.000966998	0.000937525	0.000111163	0.00133861	0.000289231	0.000728705
	Bahamas, The	BHS	0.000142753	0.000144138	0.000102813	0.000117128	9.39781e-05	0.000120162
	Cyprus	CYP	0.000310333	0.000313344	0.00015937	0.000329367	0.000243748	0.000271232
	Suriname	SUR	3.93503e-05	3.37158e-05	5.18282e-06	8.33986e-05	3.16096e-05	3.86514e-05
	Malta	MLT	0.000179993	0.00018174	0.000126205	0.00019903	0.000209522	0.000179298
	Mauritius	MUS	0.000172545	0.000152912	4.88759e-05	0.000272124	0.000165065	0.000162304
	Panama	PAN	0.000779557	0.00078712	0.000285047	0.00118009	0.000886908	0.000783744
	Antigua and Barbuda	ATG	1.93648e-05	1.95527e-05	8.26956e-06	1.81416e-05	9.8546e-06	1.50366e-05
	Palau	PLW	3.42608e-06	3.45932e-06	1.34145e-06	2.8005e-06	1.21698e-06	2.44887e-06
	Andorra	AND	4.2826e-05	4.32415e-05	4.75413e-05	#N/A	#N/A	#N/A
	Liechtenstein	LIE	#N/A	#N/A	#N/A	#N/A	#N/A	#N/A
	St. Kitts and Nevis	KNA	1.2103e-05	1.22204e-05	6.35224e-06	1.24173e-05	9.07878e-06	1.04344e-05
	San Marino	SMR	1.81235e-05	1.82993e-05	2.0161e-05	1.68206e-05	2.358e-05	1.93969e-05
	Seychelles	SYC	1.81235e-05	1.82993e-05	5.66188e-06	2.50989e-05	1.4744e-05	1.63855e-05
	Maldives	MDV	5.89633e-05	5.47725e-05	1.37243e-05	8.24299e-05	3.6419e-05	4.92618e-05
	Grenada	GRD	1.3034e-05	1.21577e-05	2.81128e-06	1.52354e-05	5.21542e-06	9.69078e-06
	St. Lucia	LCA	2.35853e-05	2.25608e-05	6.3925e-06	2.29853e-05	8.24358e-06	1.67535e-05
	Monaco	MCO	#N/A	#N/A	#N/A	#N/A	#N/A	#N/A
	St. Vincent and the Grenadines	VCT	1.09858e-05	1.04281e-05	2.40043e-06	1.36503e-05	5.03196e-06	8.49931e-06
	Marshall Islands	MHL	3.46332e-06	3.49692e-06	5.96418e-07	2.69482e-06	4.90294e-07	2.14835e-06
	Fiji	FJI	5.89633e-05	5.69033e-05	7.73286e-06	9.86341e-05	2.93806e-05	5.03228e-05
	Nauru	NRU	2.33371e-06	2.35635e-06	8.87049e-07	1.77013e-06	6.9294e-07	1.60803e-06
	Tuvalu	TUV	8.82588e-07	8.9115e-07	1.42592e-07	6.43764e-07	1.03006e-07	5.3262e-07
	Botswana	BWA	0.00020482	0.0002043	3.2995e-05	0.000336413	0.000120859	0.000179877
	Marshall Islands	MHL	3.46332e-06	3.49692e-06	5.96418e-07	2.69482e-06	4.90294e-07	2.14835e-06
	Tuvalu	TUV	8.82588e-07	8.9115e-07	1.42592e-07	6.43764e-07	1.03006e-07	5.3262e-07

## Sheet: Emissions
			Assumptions
			Total 1850	Total 1990	Total 1850 per capita scaled	Total 1990 per capita scaled	Average 1850 1990	Average 1850 1990 per capita
	Description		Cumulative emissions since 1850	Cumulative emissions since 1990	Cumulative emissions since 1850 scaled by per capita emissions	Cumulative emissions since 1990 scaled by per capita emissions	Average cumulative emissions since 1850 and since 1990	Average cumulative emissions since 1850 and since 1990 with per capita scaling
	Countries	ISO Code	Share	Share	Share	Share	Share	Share	Average
	United States	USA	0.325292	0.195095	0.420593	0.342427	0.227151	0.405811	0.319395
	Russian Federation	RUS	0.0286235	0.0523192	0.094451	0.0569481	0.0683432	0.0849507	0.0642726
	China	CHN	0.0919746	0.263439	0.0543781	0.147455	0.202381	0.0760785	0.139284
	Germany	DEU	0.0665525	0.0311008	0.0605413	0.0345795	0.0414948	0.0538123	0.0480135
	United Kingdom	GBR	0.0360513	0.0204878	0.0595069	0.0187689	0.0347439	0.0471868	0.0361243
	Australia	AUS	0.0152687	0.0175544	0.0339923	0.0355076	0.0186368	0.0349872	0.0259912
	Canada	CAN	0.0215115	0.0212403	0.0341414	0.0347451	0.0227657	0.034894	0.0282163
	Brazil	BRA	0.01057	0.0542368	0.0312913	0.0409893	0.0530916	0.0343362	0.0374192
	Japan	JPN	0.0568159	0.0400127	0.0179033	0.0383712	0.0331366	0.0230063	0.0348743
	Kazakhstan	KAZ	0.0023109	0.0110086	0.0154222	0.0185238	0.0111132	0.0165028	0.0124803
	France	FRA	0.0387933	0.0152274	0.0178616	0.0102156	0.0203059	0.0158809	0.0197141
	Poland	POL	0.0104704	0.0121168	0.0168787	0.0119521	0.0148748	0.0157469	0.0136733
	Indonesia	IDN	0.00849075	0.038817	0.00734294	0.0163551	0.0317469	0.00956388	0.0187194
	Italy	ITA	0.0294097	0.0153343	0.00759372	0.01196	0.0140782	0.00881284	0.0145314
	Czechia	CZE	0.00415911	0.00443653	0.00968044	0.00551092	0.00592693	0.00859834	0.00638538
	Belgium	BEL	0.00838237	0.00428256	0.00866262	0.00469615	0.00583229	0.00761434	0.00657839
	Saudi Arabia	SAU	0.0200405	0.0144254	0.00433812	0.0171267	0.00989613	0.00704643	0.0121455
	Netherlands	NLD	0.0143543	0.00682541	0.00642525	0.00788505	0.00683761	0.00691791	0.00820759
	South Africa	ZAF	0.00248709	0.0154749	0.00523256	0.011977	0.0125453	0.00688132	0.00909969
	Korea, Rep.	KOR	0.0237112	0.0167347	0.00400659	0.0162596	0.0113893	0.00658394	0.0131142
	Argentina	ARG	0.00500196	0.0119084	0.00554622	0.00919565	0.0107427	0.00654217	0.00815617
	Mexico	MEX	0.0114156	0.0148827	0.00498109	0.00518409	0.0158215	0.00512179	0.00956777
	Qatar	QAT	0.00562279	0.00361688	0.00250884	0.0145152	0.00223094	0.00482782	0.00555375
	Romania	ROU	0.00481398	0.0035226	0.00524711	0.00195656	0.00557556	0.00428512	0.00423349
	Thailand	THA	0.00497747	0.0101359	0.00362949	0.00429267	0.0102888	0.00386678	0.00619852
	Spain	ESP	0.0184108	0.0097468	0.00305619	0.0059541	0.00832902	0.00380102	0.00821631
	Paraguay	PRY	0.000274297	0.00318299	0.00312348	0.00447672	0.00301906	0.0035209	0.00293291
	Colombia	COL	0.00280832	0.00751589	0.00325828	0.00326072	0.00810525	0.00331516	0.0047106
	United Arab Emirates	ARE	0.0114687	0.00553302	0.00172666	0.00971568	0.00343832	0.00327989	0.00586038
	Denmark	DNK	0.00547239	0.00227015	0.00289905	0.00261684	0.00254314	0.00287095	0.00311209
	Ireland	IRL	0.00597108	0.00221643	0.00274571	0.00286887	0.00235286	0.00282628	0.00316354
	Turkey	TUR	0.0161449	0.00971742	0.00253815	0.00332815	0.00950885	0.00278597	0.00733724
	Belarus	BLR	0.000807698	0.00185365	0.00348787	0.00111525	0.00312568	0.0027722	0.00219372
	New Zealand	NZL	0.00213468	0.00162428	0.00291136	0.00154372	0.00223147	0.00254714	0.00216544
	Iceland	ISL	0.000256281	0.000431174	0.00264629	0.00145801	0.00058347	0.00233407	0.00128488
	Bulgaria	BGR	0.0010667	0.0016111	0.00256621	0.00120188	0.00232536	0.00218886	0.00182669
	Hungary	HUN	0.00255099	0.00214895	0.00244446	0.00143515	0.00283643	0.00218578	0.00226696
	Greece	GRC	0.00236457	0.00344984	0.00160682	0.00342834	0.00286119	0.00206158	0.00262872
	Austria	AUT	0.00707844	0.00222	0.00210518	0.00163327	0.00263223	0.00200732	0.00294607
	Serbia	SRB	0.000578544	0.00176888	0.00208408	0.00140748	0.00221136	0.00192302	0.00166223
	Peru	PER	0.00109807	0.00533434	0.00159547	0.00250728	0.0049011	0.00185032	0.0028811
	Kuwait	KWT	0.00321386	0.00231866	0.00101722	0.00377195	0.00162002	0.00160973	0.00225857
	Slovak Republic	SVK	0.00138782	0.00129971	0.00179611	0.000931997	0.00180092	0.00156433	0.00146348
	Trinidad and Tobago	TTO	0.000213225	0.00135549	0.000939645	0.00359766	0.000938226	0.00150683	0.00142518
	Finland	FIN	0.00354949	0.00143701	0.00159796	0.00111266	0.00177551	0.00148495	0.00182626
	Iraq	IRQ	0.000879993	0.0063026	0.00102755	0.00267424	0.00490464	0.00141577	0.00286747
	Norway	NOR	0.00790014	0.00112383	0.00166069	0.000692993	0.0016992	0.00138495	0.0024103
	Estonia	EST	0.000448121	0.000564918	0.00133749	0.000708203	0.000776528	0.00116982	0.00083418
	Turkmenistan	TKM	0.000247066	0.00224936	0.000760197	0.00235737	0.00165796	0.00111964	0.0013986
	Sweden	SWE	0.00805182	0.000580935	0.00173731	9.62911e-05	0.0021182	0.00111914	0.00228395
	Ecuador	ECU	0.000488908	0.00324464	0.000830224	0.00175219	0.0027006	0.00106118	0.00167962
	Lithuania	LTU	0.000982829	0.000543209	0.00136047	0.000312368	0.00105275	0.00102566	0.000879548
	Oman	OMN	0.00115742	0.00204068	0.00051066	0.00272399	0.00128652	0.000946473	0.00144429
	Switzerland	CHE	0.0101936	0.00160397	0.000913696	0.000877841	0.00175585	0.000919647	0.00271077
	Portugal	PRT	0.00302441	0.00211786	0.00076676	0.00129206	0.00190005	0.000909156	0.00166838
	Israel	ISR	0.00353706	0.00230366	0.000571047	0.00166303	0.00173098	0.00082085	0.0017711
	Azerbaijan	AZE	0.0004724	0.00179636	0.000724568	0.00095716	0.00175321	0.000797053	0.00108346
	Uruguay	URY	0.000403559	0.000821282	0.000727112	0.000590852	0.000956914	0.000701227	0.000700158
	Georgia	GEO	0.000185441	0.000654779	0.000837842	0.000346207	0.000993952	0.000697424	0.000619274
	Bahrain	BHR	0.000802686	0.000880331	0.000432042	0.00157941	0.000617659	0.000679703	0.000831972
	Cuba	CUB	0	0.000773587	0.000868875	0.000160074	0.00164775	0.0006349	0.000680865
	Brunei Darussalam	BRN	0.000402389	0.000429245	0.000376107	0.00122938	0.000311381	0.000565556	0.000552342
	Bosnia and Herzegovina	BIH	0.000205486	0.000467465	0.000714597	0.000202682	0.000828622	0.000556736	0.000495931
	Moldova	MDA	0.000115506	0.000472084	0.00065807	0.000262861	0.000726546	0.000544292	0.000463227
	Luxembourg	LUX	0.00100907	0.00033953	0.000498083	0.000528888	0.000358321	0.000514956	0.000541474
	Croatia	HRV	0.000998213	0.000615288	0.0005346	0.000293826	0.000833418	0.000471279	0.000624437
	Latvia	LVA	0.00047904	0.000176363	0.000530106	4.95654e-05	0.000506793	0.000357802	0.000349945
	Malaysia	MYS	0.00546222	0.000577084	0.000549387	2.94305e-05	0.00213744	0.00035296	0.00151809
	Singapore	SGP	0.010645	0.00130705	0.000188129	0.000907449	0.000847099	0.000333218	0.00237133
	Costa Rica	CRI	0.000490484	0.000672995	0.000299786	0.000261947	0.0007631	0.000294423	0.000463789
	Slovenia	SVN	0.00081405	0.000442925	0.000252704	0.000278547	0.00046115	0.000263962	0.00041889
	North Macedonia	MKD	0.000139333	0.000341919	0.000281053	0.00017002	0.000446064	0.000252968	0.000271893
	Chile	CHL	0.00267926	0.000896998	0.000296989	0.000122984	0.00136046	0.000247316	0.000934
	Jamaica	JAM	6.4286e-05	0.000457295	0.000136409	0.000221374	0.000415554	0.000159811	0.000242455
	Armenia	ARM	0.000136904	0.000322838	0.000171545	0.000112317	0.000408445	0.000157167	0.000218202
	Belize	BLZ	6.47607e-06	0.000196036	0.000101514	0.000284274	0.000149098	0.000143757	0.000146859
	Dominican Republic	DOM	0.000777946	0.000647331	0.000142828	0.000112087	0.000764215	0.000136569	0.000430163
	El Salvador	SLV	0.000110065	0.000586507	0.00011775	0.000162546	0.00056364	0.000131236	0.000278624
	Barbados	BRB	1.48186e-05	0.000143449	7.8657e-05	0.000218607	0.000109359	0.000111071	0.00011266
	Equatorial Guinea	GNQ	5.37506e-05	0.000420744	5.29974e-05	0.00031757	0.000257116	0.000103677	0.000200976
	Albania	ALB	0.000141527	0.000331713	9.53311e-05	0.000118577	0.000330717	0.00010304	0.000186818
	Montenegro	MNE	7.52537e-05	5.61424e-05	0.00014293	1.53044e-05	0.000151816	9.78343e-05	8.98802e-05
	Guatemala	GTM	0.000289231	0.00033302	0.000134679	1.90947e-05	0.000795164	9.51708e-05	0.000277727
	Bahamas, The	BHS	9.39781e-05	0.000140141	6.83888e-05	0.000143506	0.000116863	8.72393e-05	0.000108353
	Cyprus	CYP	0.000243748	0.000258012	6.30067e-05	0.000159548	0.000202526	8.59392e-05	0.000168797
	Suriname	SUR	3.16096e-05	0.000135433	4.45482e-05	8.89163e-05	0.00011481	5.58611e-05	7.85297e-05
	Malta	MLT	0.000209522	8.66946e-05	1.21238e-05	4.24043e-05	6.16279e-05	1.87326e-05	7.18509e-05
	Mauritius	MUS	0.000165065	0.000120769	8.9683e-06	3.46783e-05	8.33518e-05	1.4441e-05	7.12121e-05
	Panama	PAN	0.000886908	0	4.18512e-05	0	0.000120092	8.56506e-06	0.000176236
	Antigua and Barbuda	ATG	9.8546e-06	2.10648e-05	6.04528e-06	1.41721e-05	1.69461e-05	8.01822e-06	1.26835e-05
	Palau	PLW	1.21698e-06	7.52376e-06	4.82713e-06	9.3694e-06	6.43727e-06	5.99604e-06	5.8951e-06
	Andorra	AND	0	1.16384e-05	5.68347e-06	5.08514e-06	1.30807e-05	5.61564e-06	6.85056e-06
	Liechtenstein	LIE	0	7.6532e-06	3.44392e-06	4.46492e-06	7.51897e-06	3.76759e-06	4.47477e-06
	St. Kitts and Nevis	KNA	9.07878e-06	7.70323e-06	2.90479e-06	3.7269e-06	7.59609e-06	3.16811e-06	5.69632e-06
	San Marino	SMR	2.358e-05	7.37436e-06	2.24208e-06	4.83437e-06	6.09513e-06	2.88719e-06	7.83552e-06
	Seychelles	SYC	1.4744e-05	1.47911e-05	1.12409e-06	5.46188e-06	9.56675e-06	1.9975e-06	7.94756e-06
	Maldives	MDV	3.6419e-05	3.32938e-05	9.17788e-07	6.33747e-06	1.96098e-05	1.922e-06	1.64166e-05
	Grenada	GRD	5.21542e-06	1.07358e-05	8.39371e-07	2.76235e-06	7.77198e-06	1.26559e-06	4.76509e-06
	St. Lucia	LCA	8.24358e-06	1.25014e-05	6.73671e-07	2.60114e-06	8.63183e-06	1.08411e-06	5.62262e-06
	Monaco	MCO	0	3.05093e-06	1.05429e-06	7.63996e-07	3.71249e-06	9.88957e-07	1.59511e-06
	St. Vincent and the Grenadines	VCT	5.03196e-06	7.34623e-06	6.99454e-07	1.55459e-06	6.01237e-06	9.10326e-07	3.59249e-06
	Marshall Islands	MHL	4.90294e-07	4.89608e-06	3.94741e-07	1.72633e-06	3.26166e-06	6.69765e-07	1.90648e-06
	Fiji	FJI	2.93806e-05	0	8.05761e-07	0	9.02494e-06	2.29374e-07	6.57344e-06
	Nauru	NRU	6.9294e-07	1.27395e-06	1.76605e-07	3.82842e-07	1.05112e-06	2.27845e-07	6.34216e-07
	Tuvalu	TUV	1.03006e-07	5.87836e-07	3.27465e-08	9.16123e-08	4.47224e-07	4.63565e-08	2.1813e-07
	Botswana	BWA	0.000120859	0	6.04558e-06	0	5.27126e-06	2.76702e-08	2.20339e-05

## Sheet: Both
			Assumptions
			Cumulative + GNI	Cumulative + GNI (debt)	Cumulative + GNI (pc)	Cumulative + GNI (PPP)	Cumulative + GNI (PPP, pc)	Cumulative (pc) + GNI	Cumulative (pc) + GNI (debt)	Cumulative (pc) + GNI (pc)	Cumulative (pc) + GNI (PPP)	Cumulative (pc) + GNI (PPP, pc)
	Description		Cumulative emissions (average of 1850/1990) with total GNI	Cumulative emissions (average of 1850/1990) with total GNI (accounting for debt)	Cumulative emissions (average of 1850/1990) with total GNI (with per capita scaling)	Cumulative emissions (average of 1850/1990) with total GNI (PPP)	Cumulative emissions (average of 1850/1990) with total GNI (PPP with per capita scaling)	Cumulative emissions (average of 1850/1990 with per capita scaling) with total GNI	Cumulative emissions (average of 1850/1990 with per capita scaling) with total GNI (accounting for debt)	Cumulative emissions (average of 1850/1990 with per capita scaling) with total GNI (with per capita scaling)	Cumulative emissions (average of 1850/1990 with per capita scaling) with total GNI (PPP)	Cumulative emissions (average of 1850/1990 with per capita scaling) with total GNI (PPP with per capita scaling)
	Emissions
	Economic
	Countries	ISO Code	Share	Share	Share	Share	Share	Share	Share	Share	Share	Share	Average
	United States	USA	0.250838	0.252169	0.347346	0.212054	0.276455	0.340168	0.341499	0.436676	0.301325	0.365726	0.312425
	Russian Federation	RUS	0.0441715	0.0439549	0.037041	0.0534016	0.0485444	0.0524751	0.0522585	0.0453446	0.0616756	0.0568184	0.0495686
	China	CHN	0.194356	0.193378	0.126626	0.208904	0.14736	0.131203	0.130225	0.0634732	0.145608	0.0840634	0.14252
	Germany	DEU	0.0460881	0.0463338	0.0524085	0.0430843	0.0540673	0.0522468	0.0524925	0.0585672	0.0492257	0.0602087	0.0514723
	United Kingdom	GBR	0.0353838	0.0355584	0.0373785	0.0320781	0.0354315	0.0416051	0.0417798	0.0435999	0.0382857	0.0416391	0.038274
	Australia	AUS	0.0180138	0.0180981	0.0213337	0.0152842	0.0169704	0.026189	0.0262733	0.0295089	0.0234551	0.0251413	0.0220268
	Canada	CAN	0.0223763	0.0224829	0.0242194	0.0200407	0.0221605	0.0284404	0.028547	0.0302835	0.0260971	0.0282169	0.0252865
	Brazil	BRA	0.0377257	0.0373952	0.028948	0.0408266	0.0318767	0.0283478	0.0280172	0.0195701	0.0314155	0.0224656	0.0306588
	Japan	JPN	0.0492379	0.0495547	0.0518469	0.0417631	0.0450116	0.0441726	0.0444894	0.0467816	0.0366776	0.0399261	0.0449461
	Kazakhstan	KAZ	0.00656902	0.00645341	0.0057727	0.00757573	0.00672164	0.00926383	0.00914822	0.00846751	0.0102666	0.0094125	0.00796511
	France	FRA	0.0276057	0.027775	0.0286607	0.0255082	0.0295718	0.0253931	0.0255624	0.0264481	0.0232838	0.0273474	0.0267156
	Poland	POL	0.0110771	0.0111124	0.00892477	0.0133119	0.0126865	0.0115131	0.0115484	0.00936075	0.0137405	0.0131151	0.011639
	Indonesia	IDN	0.0226435	0.0223956	0.0165598	0.0303568	0.0201466	0.0115519	0.0113039	0.00546807	0.0192418	0.00903154	0.0168699
	Italy	ITA	0.0198336	0.0199577	0.0185224	0.0194801	0.0217596	0.0172009	0.017325	0.0158897	0.0168385	0.019118	0.0185926
	Czechia	CZE	0.00442927	0.00444348	0.00379313	0.00496064	0.00504854	0.00576497	0.00577918	0.00512883	0.00629416	0.00638206	0.00520243
	Belgium	BEL	0.00635081	0.00638412	0.0070821	0.00587849	0.00711333	0.00724182	0.00727513	0.00797311	0.00676709	0.00800193	0.00700679
	Saudi Arabia	SAU	0.0100845	0.0101343	0.00794284	0.0130222	0.0149793	0.00865965	0.00870946	0.00651795	0.0115913	0.0135484	0.010519
	Netherlands	NLD	0.00913909	0.00919456	0.0110571	0.00818468	0.0106036	0.00917922	0.00923469	0.0110972	0.00822133	0.0106402	0.00965517
	South Africa	ZAF	0.00860179	0.00848641	0.00664688	0.00992817	0.00752701	0.00576977	0.00565439	0.00381486	0.00708792	0.00468676	0.00682039
	Korea, Rep.	KOR	0.0164396	0.0165438	0.0149394	0.0161501	0.017563	0.0140369	0.014141	0.0125366	0.01374	0.0151529	0.0151243
	Argentina	ARG	0.00851412	0.00834391	0.00625469	0.0099201	0.00788198	0.00641382	0.00624362	0.0041544	0.00781297	0.00577484	0.00713144
	Mexico	MEX	0.0154881	0.0151226	0.00976416	0.0193395	0.0136333	0.0101382	0.00977271	0.00441426	0.0139781	0.00827185	0.0119923
	Qatar	QAT	0.00215891	0.00216903	0.00278158	0.00228093	0.00392948	0.00345735	0.00346747	0.00408002	0.00357906	0.00522761	0.00331315
	Romania	ROU	0.00432191	0.00433678	0.0032996	0.00564854	0.00520008	0.00367667	0.00369154	0.00265436	0.00500003	0.00455157	0.00423811
	Thailand	THA	0.00814433	0.00802291	0.00566304	0.0107947	0.00764241	0.00493327	0.00481185	0.00245199	0.00757629	0.00442403	0.00644648
	Spain	ESP	0.0127977	0.0128814	0.010607	0.0130306	0.0133793	0.0105337	0.0106174	0.00834293	0.0107609	0.0111096	0.0114061
	Paraguay	PRY	0.00174743	0.00173405	0.00154403	0.00191932	0.00164924	0.00199833	0.00198496	0.00179494	0.00216884	0.00189877	0.00184399
	Colombia	COL	0.0060029	0.00590266	0.00435546	0.00766478	0.00546395	0.00360782	0.00350757	0.00196038	0.00526402	0.00306319	0.00467927
	United Arab Emirates	ARE	0.00427807	0.00430289	0.00458513	0.00482936	0.00745791	0.00419885	0.00422366	0.00450591	0.00474832	0.00737688	0.0050507
	Denmark	DNK	0.00360688	0.00362953	0.00509077	0.0029706	0.00401062	0.00377079	0.00379343	0.00525467	0.00313331	0.00417333	0.00394339
	Ireland	IRL	0.00322605	0.00324592	0.00455988	0.00283123	0.00416474	0.00346275	0.00348262	0.00479658	0.00306688	0.00440039	0.0037237
	Turkey	TUR	0.0100089	0.00972122	0.00609653	0.0158253	0.012837	0.00664742	0.00635973	0.00273504	0.0124568	0.0094685	0.00921565
	Belarus	BLR	0.00193178	0.001904	0.00162378	0.00238085	0.00196941	0.00175504	0.00172726	0.00144704	0.00220239	0.00179095	0.00187325
	New Zealand	NZL	0.00246352	0.00247659	0.00258162	0.0021049	0.00218523	0.00262134	0.00263441	0.00273945	0.00226168	0.00234202	0.00244108
	Iceland	ISL	0.000440179	0.000441618	0.000530069	0.000385664	0.000420398	0.00131548	0.00131692	0.00140537	0.00126123	0.00129596	0.000881289
	Bulgaria	BGR	0.00158566	0.00158976	0.00127694	0.00194917	0.00169812	0.0015174	0.0015215	0.00120868	0.00187968	0.00162863	0.00158555
	Hungary	HUN	0.00239955	0.00240907	0.00183098	0.00290152	0.00269643	0.00207422	0.00208373	0.00150564	0.00257453	0.00236943	0.00228451
	Greece	GRC	0.00271627	0.00272874	0.00208729	0.00291393	0.00261559	0.00231645	0.00232892	0.00168748	0.00251239	0.00221406	0.00241211
	Austria	AUT	0.00411104	0.00413814	0.00488642	0.00370721	0.00485848	0.00379858	0.00382568	0.00457396	0.0033932	0.00454447	0.00418372
	Serbia	SRB	0.00141996	0.00139479	0.00116697	0.00169373	0.00139688	0.00127579	0.00125061	0.00102279	0.00154833	0.00125148	0.00134213
	Peru	PER	0.00376108	0.00371735	0.00265928	0.00427938	0.00300384	0.00223567	0.00219194	0.00113387	0.00275048	0.00147494	0.00272078
	Kuwait	KWT	0.00172302	0.00173188	0.00161661	0.00191766	0.00241873	0.00171787	0.00172673	0.00161146	0.00191168	0.00241274	0.00187884
	Slovak Republic	SVK	0.00155883	0.00156521	0.00123028	0.00172177	0.00159606	0.00144053	0.00144691	0.00111198	0.00160247	0.00147677	0.00147508
	Trinidad and Tobago	TTO	0.000612591	0.000613982	0.000524706	0.000640471	0.00057654	0.000896889	0.00089828	0.000809005	0.000924472	0.000860541	0.000735747
	Finland	FIN	0.0026144	0.00263114	0.00310321	0.00221591	0.00266446	0.00246911	0.00248585	0.00295793	0.00206962	0.00251817	0.00257298
	Iraq	IRQ	0.00372559	0.00371912	0.00260287	0.00432523	0.00289654	0.00198113	0.00197466	0.000858411	0.00257714	0.00114846	0.00258091
	Norway	NOR	0.00359483	0.00362145	0.00655255	0.00281238	0.00480214	0.0034377	0.00346432	0.00639542	0.00265428	0.00464405	0.00419791
	Estonia	EST	0.000580806	0.000582673	0.000501727	0.000621192	0.000613034	0.000777452	0.000779319	0.000698372	0.000817566	0.000809408	0.000678155
	Turkmenistan	TKM	0.00110476	0.00110743	0.000877856	0.00120677	0.000953936	0.000835587	0.000838261	0.000608688	0.000936585	0.000683747	0.000915362
	Sweden	SWE	0.00472976	0.00476535	0.00636102	0.00380677	0.00508786	0.00423022	0.00426581	0.00586148	0.00330583	0.00458692	0.0047001
	Ecuador	ECU	0.00199625	0.00196238	0.00144609	0.00223848	0.00159708	0.00117653	0.00114265	0.000626363	0.00141685	0.00077545	0.00143781
	Lithuania	LTU	0.00086736	0.000870666	0.000696129	0.00102531	0.0010188	0.000853812	0.000857118	0.000682581	0.00101121	0.00100471	0.00088877
	Oman	OMN	0.00114759	0.00115248	0.000872721	0.00133191	0.0012232	0.000977564	0.000982455	0.000702691	0.00116112	0.00105241	0.00106042
	Switzerland	CHE	0.0054678	0.0055123	0.0107918	0.00370463	0.00597757	0.00504969	0.00509419	0.0103737	0.00328536	0.0055583	0.00608153
	Portugal	PRT	0.00241581	0.00243003	0.0018036	0.00262648	0.00246423	0.00192035	0.00193457	0.00130815	0.00212974	0.00196748	0.00210004
	Israel	ISR	0.00343681	0.00346175	0.00372302	0.00260351	0.00263594	0.00298174	0.00300668	0.00326795	0.00214726	0.00217969	0.00294444
	Azerbaijan	AZE	0.0011648	0.00115505	0.000910591	0.00153039	0.00111434	0.000686714	0.000676966	0.000432503	0.0010511	0.000635046	0.000935751
	Uruguay	URY	0.0008418	0.000845323	0.000637952	0.000830099	0.000681092	0.000713953	0.000717476	0.000510105	0.00070168	0.000552673	0.000703215
	Georgia	GEO	0.000603809	0.000589167	0.000509691	0.000745512	0.000590554	0.000455541	0.000440899	0.000361423	0.000596641	0.000441682	0.000533492
	Bahrain	BHR	0.000529941	0.000532085	0.000446246	0.000633742	0.000710797	0.000560962	0.000563106	0.000477267	0.000664466	0.000741521	0.000586013
	Cuba	CUB	0.001422	0.0014278	0.000955857	0	0	0.000915562	0.000921361	0.000449423	0	0	0.000609199
	Brunei Darussalam	BRN	0.000238918	0.000239725	0.000219432	0.000282888	0.000357199	0.000366006	0.000366813	0.000346519	0.000409898	0.000484209	0.000331161
	Bosnia and Herzegovina	BIH	0.000544123	0.000534721	0.00043587	0.000658301	0.000517775	0.000408177	0.000398775	0.000299924	0.000521844	0.000381318	0.000470083
	Moldova	MDA	0.000436566	0.000431005	0.000372014	0.000525638	0.00042165	0.000345436	0.000339875	0.000280884	0.000434078	0.00033009	0.000391724
	Luxembourg	LUX	0.000498403	0.000501499	0.000824014	0.000421875	0.000684128	0.00057672	0.000579815	0.000902331	0.000500059	0.000762312	0.000625116
	Croatia	HRV	0.000809243	0.00081305	0.000581642	0.00100361	0.000916647	0.00062817	0.000631976	0.000400568	0.000821995	0.000735031	0.000734193
	Latvia	LVA	0.000467676	0.000469754	0.000354308	0.000537226	0.000493405	0.000393178	0.000395256	0.00027981	0.000462422	0.0004186	0.000427164
	Malaysia	MYS	0.00325497	0.00327617	0.00165128	0.00513426	0.00380235	0.00236272	0.00238392	0.00075903	0.00424035	0.00290843	0.00297735
	Singapore	SGP	0.00249179	0.00251184	0.00355725	0.00273822	0.00574819	0.00223484	0.0022549	0.0033003	0.00248068	0.00549065	0.00328087
	Costa Rica	CRI	0.000762283	0.000741517	0.000497175	0.000858203	0.000627496	0.000527941	0.000507175	0.000262834	0.000623321	0.000392614	0.000580056
	Slovenia	SVN	0.000569072	0.000572354	0.000454944	0.000622351	0.000638094	0.000470476	0.000473758	0.000356348	0.000523456	0.000539199	0.000522005
	North Macedonia	MKD	0.000298186	0.00029139	0.000234362	0.000383399	0.00029309	0.000201637	0.00019484	0.000137813	0.00028656	0.000196251	0.000251753
	Chile	CHL	0.00238202	0.00239853	0.00129074	0.00284547	0.00202135	0.00182545	0.00184195	0.000734167	0.00228784	0.00146372	0.00190912
	Jamaica	JAM	0.000299701	0.00028805	0.000220115	0.000335503	0.000240276	0.000171827	0.000160176	9.22423e-05	0.000207335	0.000112109	0.000212734
	Armenia	ARM	0.000287451	0.000278851	0.000214519	0.0003888	0.000273034	0.00016181	0.00015321	8.88784e-05	0.000262869	0.000147104	0.000225653
	Belize	BLZ	8.85867e-05	8.76567e-05	7.65601e-05	8.99682e-05	7.7913e-05	8.59157e-05	8.49857e-05	7.38891e-05	8.72193e-05	7.5164e-05	8.27859e-05
	Dominican Republic	DOM	0.000915008	0.000890074	0.000486874	0.00126426	0.000771824	0.000601181	0.000576247	0.000173047	0.000949837	0.000457405	0.000708575
	El Salvador	SLV	0.000441443	0.000428568	0.000298427	0.000531759	0.000337339	0.000225239	0.000212363	8.22228e-05	0.000315127	0.000120708	0.00029932
	Barbados	BRB	8.48652e-05	8.51579e-05	6.80299e-05	7.40762e-05	6.21824e-05	8.57207e-05	8.60134e-05	6.88854e-05	7.48764e-05	6.29826e-05	7.5279e-05
	Equatorial Guinea	GNQ	0.000181414	0.000181927	0.000135471	0.000218247	0.000155656	0.000104694	0.000105206	5.87505e-05	0.000141345	7.87544e-05	0.000136146
	Albania	ALB	0.000261008	0.000253783	0.000178957	0.000352956	0.000236418	0.000147168	0.000139943	6.51173e-05	0.000238874	0.000122336	0.000199656
	Montenegro	MNE	0.000109758	0.000103627	8.35818e-05	0.000140385	0.000113672	8.27668e-05	7.66358e-05	5.65902e-05	0.000113299	8.65856e-05	9.66903e-05
	Guatemala	GTM	0.000881416	0.000866667	0.000453173	0.00106819	0.000542902	0.000531415	0.000516666	0.000103173	0.000717563	0.00019227	0.000587344
	Bahamas, The	BHS	0.000129858	0.00013055	0.000109844	0.00011715	0.000105531	0.000115045	0.000115738	9.50312e-05	0.000102268	9.06494e-05	0.000111166
	Cyprus	CYP	0.000256537	0.000258043	0.000180957	0.000266275	0.000223339	0.000198243	0.000199748	0.000122662	0.000207839	0.000164904	0.000207855
	Suriname	SUR	7.70942e-05	7.42749e-05	5.99972e-05	9.92405e-05	7.33101e-05	4.76193e-05	4.48e-05	3.05223e-05	6.9688e-05	4.37576e-05	6.20304e-05
	Malta	MLT	0.000120872	0.000121746	9.39229e-05	0.000130476	0.000135655	9.94246e-05	0.000100298	7.24749e-05	0.000108983	0.000114161	0.000109801
	Mauritius	MUS	0.000128008	0.000118184	6.61166e-05	0.000177939	0.0001243	9.35522e-05	8.37284e-05	3.16608e-05	0.000143418	8.97795e-05	0.000105669
	Panama	PAN	0.000450092	0.000453874	0.000202584	0.000650757	0.000503719	0.000394328	0.00039811	0.00014682	0.000594896	0.000447857	0.000424304
	Antigua and Barbuda	ATG	1.81622e-05	1.82561e-05	1.26083e-05	1.75668e-05	1.34159e-05	1.36982e-05	1.37921e-05	8.1443e-06	1.30912e-05	8.94032e-06	1.37675e-05
	Palau	PLW	4.93288e-06	4.94951e-06	3.88946e-06	4.62563e-06	3.83268e-06	4.71225e-06	4.72887e-06	3.66882e-06	4.40155e-06	3.60861e-06	4.33503e-06
	Andorra	AND	2.79681e-05	2.81758e-05	3.03133e-05	0	0	2.42355e-05	2.44432e-05	2.65807e-05	0	0	1.61717e-05
	Liechtenstein	LIE	0	0	0	0	0	0	0	0	0	0	0
	St. Kitts and Nevis	KNA	9.85372e-06	9.91244e-06	6.9745e-06	1.0019e-05	8.345e-06	7.6397e-06	7.69842e-06	4.76048e-06	7.79971e-06	6.12568e-06	7.91287e-06
	San Marino	SMR	1.21155e-05	1.22035e-05	1.3129e-05	1.14711e-05	1.48458e-05	1.05115e-05	1.05995e-05	1.1525e-05	9.86293e-06	1.32377e-05	1.19502e-05
	Seychelles	SYC	1.38514e-05	1.39393e-05	7.61463e-06	1.73529e-05	1.21654e-05	1.00667e-05	1.01546e-05	3.82996e-06	1.35609e-05	8.37337e-06	1.10909e-05
	Maldives	MDV	3.93068e-05	3.72099e-05	1.66678e-05	5.10759e-05	2.80357e-05	3.04628e-05	2.83659e-05	7.82383e-06	4.22162e-05	1.9176e-05	3.00341e-05
	Grenada	GRD	1.04075e-05	9.96903e-06	5.29181e-06	1.15175e-05	6.5009e-06	7.15425e-06	6.7158e-06	2.03857e-06	8.25825e-06	3.24161e-06	7.10953e-06
	St. Lucia	LCA	1.61167e-05	1.5604e-05	7.51251e-06	1.58268e-05	8.44603e-06	1.23428e-05	1.18301e-05	3.73861e-06	1.20461e-05	4.66529e-06	1.08129e-05
	Monaco	MCO	0	0	0	0	0	0	0	0	0	0	0
	St. Vincent and the Grenadines	VCT	8.50287e-06	8.2238e-06	4.20655e-06	9.84291e-06	5.52787e-06	5.95182e-06	5.67275e-06	1.65549e-06	7.28715e-06	2.97211e-06	5.98433e-06
	Marshall Islands	MHL	3.36369e-06	3.38049e-06	1.92908e-06	2.98227e-06	1.87877e-06	2.06773e-06	2.08453e-06	6.33121e-07	1.68381e-06	5.80311e-07	2.05838e-06
	Fiji	FJI	3.40143e-05	3.29835e-05	8.37932e-06	5.38845e-05	1.92142e-05	2.96165e-05	2.85856e-05	3.98148e-06	4.94792e-05	1.4809e-05	2.74948e-05
	Nauru	NRU	1.69322e-06	1.70454e-06	9.69132e-07	1.41236e-06	8.73002e-07	1.28157e-06	1.2929e-06	5.5749e-07	9.99912e-07	4.60558e-07	1.12447e-06
	Tuvalu	TUV	6.6521e-07	6.69492e-07	2.94917e-07	5.46178e-07	2.75503e-07	4.64774e-07	4.69056e-07	9.44813e-08	3.45385e-07	7.47101e-08	3.89971e-07
	Botswana	BWA	0.000105116	0.000104855	1.91347e-05	0.000171008	6.30856e-05	0.000102494	0.000102233	1.65129e-05	0.000168382	6.04594e-05	9.13281e-05
