# Supplementary material for: The range of equitable climate finance contributions and recipient flows under the COP29 New Collective Quantified Goal
Source: Research Square preprint supplement (doi:10.21203/rs.3.rs-6050567/v1), 2025-03-26
Supplement: Supplementary file 2 [file 33fddc2fab0f773e01af2bf7.xlsx]

## Sheet: Average
			Total Gross National Income	Total Gross National Income with per capita scaling	Total Gross National Income (PPP)	Total Gross National Income (PPP) with per capita scaling	Cumulative emissions since 1850	Cumulative emissions since 1990	Cumulative emissions since 1850 scaled by per capita emissions	Cumulative emissions since 1990 scaled by per capita emissions	Average cumulative emissions since 1850 and since 1990	Average cumulative emissions since 1850 and since 1990 with per capita scaling	Cumulative emissions (average of 1850/1990) with total GNI	Cumulative emissions (average of 1850/1990) with total GNI (with per capita scaling)	Cumulative emissions (average of 1850/1990) with total GNI (PPP)	Cumulative emissions (average of 1850/1990) with total GNI (PPP with per capita scaling)	Cumulative emissions (average of 1850/1990 with per capita scaling) with total GNI	Cumulative emissions (average of 1850/1990 with per capita scaling) with total GNI (with per capita scaling)	Cumulative emissions (average of 1850/1990 with per capita scaling) with total GNI (PPP)	Cumulative emissions (average of 1850/1990 with per capita scaling) with total GNI (PPP with per capita scaling)
	Countries	ISO Code	Share	Share	Share	Share	Share	Share	Share	Share	Share	Share	Share	Share	Share	Share	Share	Share	Share	Share	Average
	United States	USA	0.449321	0.541671	0.412206	0.472912	0.499921	0.492263	0.607472	0.607938	0.498004	0.611433	0.473662	0.519837	0.455105	0.485458	0.530377	0.576552	0.511819	0.542173	0.516007	154.802	United States
	Japan	JPN	0.106943	0.0817442	0.105547	0.0825995	0.0631931	0.10096	0.0258582	0.0681234	0.0726485	0.0346634	0.0897955	0.0771963	0.0890977	0.077624	0.070803	0.0582038	0.0701051	0.0586314	0.0740965	22.2289	Japan
	Germany	DEU	0.0829516	0.0733621	0.0935319	0.0967547	0.0951471	0.0784734	0.0874411	0.0613917	0.0909727	0.0810786	0.0869621	0.0821674	0.0922523	0.0938637	0.0820151	0.0772204	0.0873053	0.0889167	0.0851004	25.5301	Germany
	United Kingdom	GBR	0.0589607	0.0463571	0.0615536	0.0524118	0.0843469	0.0516949	0.0859471	0.0333219	0.0761721	0.071096	0.0675664	0.0612646	0.0688628	0.0642919	0.0650284	0.0587266	0.0663248	0.0617539	0.0630934	18.928	United Kingdom
	France	FRA	0.0571309	0.0428844	0.0643263	0.0563981	0.0465546	0.0384217	0.0257979	0.0181365	0.0445185	0.0239276	0.0508247	0.0437014	0.0544224	0.0504583	0.0405293	0.033406	0.044127	0.0401629	0.043096	12.9288	France
	Canada	CAN	0.0359864	0.0297435	0.0362297	0.0312736	0.0486815	0.0535936	0.0493112	0.0616857	0.0499113	0.0525746	0.0429488	0.0398274	0.0430705	0.0405924	0.0442805	0.0411591	0.0444022	0.0419241	0.0437331	13.1199	Canada
	Italy	ITA	0.0418824	0.0266081	0.0521265	0.0427561	0.0282509	0.0386914	0.0109678	0.0212335	0.0308648	0.0132782	0.0363736	0.0287365	0.0414956	0.0368104	0.0275803	0.0199432	0.0327024	0.0280172	0.0310177	9.30532	Italy
	Australia	AUS	0.0284638	0.0278406	0.0249542	0.0221978	0.0397123	0.0442933	0.0490958	0.0630394	0.0408592	0.052715	0.0346615	0.0343499	0.0329067	0.0315285	0.0405894	0.0402778	0.0388346	0.0374564	0.0379876	11.3963	Australia
	Spain	ESP	0.0282605	0.0149278	0.037154	0.0267657	0.0161455	0.0245931	0.00441412	0.0105708	0.0182605	0.00572696	0.0232605	0.0165942	0.0277072	0.0225131	0.0169937	0.0103274	0.0214405	0.0162464	0.0189945	5.69836	Spain
	Netherlands	NLD	0.0187251	0.0176987	0.0199633	0.0208684	0.0142456	0.0172219	0.00928013	0.013999	0.0149907	0.0104232	0.0168579	0.0163447	0.017477	0.0179296	0.0145741	0.0140609	0.0151932	0.0156458	0.0158611	4.75832	Netherlands
	Belgium	BEL	0.0112432	0.00965295	0.0124031	0.0121864	0.0134482	0.0108058	0.0125116	0.00833744	0.0127867	0.0114725	0.0120149	0.0112198	0.0125949	0.0124865	0.0113578	0.0105627	0.0119378	0.0118294	0.0116029	3.48086	Belgium
	Switzerland	CHE	0.0150248	0.0229715	0.0118486	0.0148196	0.00378352	0.00404712	0.00131967	0.0015585	0.00384952	0.00138563	0.00943717	0.0134105	0.00784906	0.00933456	0.00820522	0.0121786	0.00661712	0.00810261	0.00865241	2.59572	Switzerland
	Sweden	SWE	0.0120158	0.0122852	0.0115159	0.0117058	0.00570533	0.00146581	0.00250923	0.000170953	0.00464392	0.0016862	0.00832985	0.00846454	0.0080799	0.00817487	0.00685099	0.00698568	0.00660104	0.00669601	0.00688261	2.06478	Sweden
	Austria	AUT	0.00914908	0.00827279	0.0100186	0.0102907	0.00582743	0.00560151	0.00304056	0.00289968	0.00577087	0.00302442	0.00745997	0.00702183	0.00789475	0.00803079	0.00608675	0.00564861	0.00652153	0.00665756	0.00662319	1.98696	Austria
	Denmark	DNK	0.00764456	0.00884951	0.00711656	0.00795581	0.00552461	0.00572804	0.00418717	0.00464588	0.00557554	0.00432565	0.00661005	0.00721253	0.00634605	0.00676568	0.0059851	0.00658758	0.0057211	0.00614073	0.00627345	1.88204	Denmark
	Norway	NOR	0.00898642	0.0132144	0.00822563	0.0114853	0.00402243	0.00283565	0.00239857	0.00123033	0.0037253	0.00208669	0.00635586	0.00846985	0.00597547	0.0076053	0.00553656	0.00765055	0.00515616	0.006786	0.00620814	1.86244	Norway
	Ireland	IRL	0.00670932	0.00783982	0.00693171	0.00868081	0.00501341	0.0055925	0.00396568	0.00509334	0.00515839	0.00425834	0.00593386	0.00649911	0.00604505	0.0069196	0.00548383	0.00604908	0.00559502	0.00646957	0.00601325	1.80397	Ireland
	Greece	GRC	0.00420857	0.00152161	0.00621081	0.00343764	0.0054607	0.00870462	0.00232077	0.00608661	0.00627285	0.00310617	0.00524071	0.00389723	0.00624183	0.00485525	0.00365737	0.00231389	0.00465849	0.0032719	0.00452595	1.35778	Greece
	Finland	FIN	0.0056521	0.00513346	0.00556385	0.00516028	0.0039817	0.00362585	0.00230797	0.0019754	0.00389261	0.00223736	0.00477235	0.00451304	0.00472823	0.00452645	0.00394473	0.00368541	0.00390061	0.00369882	0.00407223	1.22167	Finland
	New Zealand	NZL	0.00441189	0.0033966	0.00414054	0.00310342	0.0051574	0.00409837	0.00420494	0.00274069	0.00489226	0.00383776	0.00465207	0.00414443	0.0045164	0.00399784	0.00412482	0.00361718	0.00398915	0.00347059	0.00402758	1.20827	New Zealand
	Portugal	PRT	0.00479818	0.00197782	0.00702413	0.00439692	0.0037722	0.00534378	0.00110745	0.00229389	0.00416566	0.00136982	0.00448192	0.00307174	0.0055949	0.00428129	0.003084	0.00167382	0.00419698	0.00288337	0.00363988	1.09196	Portugal
	Luxembourg	LUX	0.00104503	0.0014942	0.00101665	0.00146699	0.000761825	0.000856702	0.000719392	0.000938977	0.000785579	0.000775881	0.000915303	0.00113989	0.000901115	0.00112628	0.000910454	0.00113504	0.000896266	0.00112144	0.00100039	0.300117	Luxembourg
	Iceland	ISL	0.00048592	0.00055224	0.000391873	0.000372583	0.00134307	0.00108794	0.0038221	0.00258853	0.00127919	0.00351672	0.000882556	0.000915717	0.000835534	0.000825889	0.00200132	0.00203448	0.0019543	0.00194465	0.00149081	0.447244	Iceland

## Sheet: Economic
			Assumptions
			Total GNI	Total GNI per capita scaled	Total GNI (PPP)	Total GNI (PPP) per capita scaled
	Description		Total Gross National Income	Total Gross National Income with per capita scaling	Total Gross National Income (PPP)	Total Gross National Income (PPP) with per capita scaling
	Countries	ISO Code	Share	Share	Share	Share
	United States	USA	0.449321	0.541671	0.412206	0.472912
	Japan	JPN	0.106943	0.0817442	0.105547	0.0825995
	Germany	DEU	0.0829516	0.0733621	0.0935319	0.0967547
	United Kingdom	GBR	0.0589607	0.0463571	0.0615536	0.0524118
	France	FRA	0.0571309	0.0428844	0.0643263	0.0563981
	Canada	CAN	0.0359864	0.0297435	0.0362297	0.0312736
	Italy	ITA	0.0418824	0.0266081	0.0521265	0.0427561
	Australia	AUS	0.0284638	0.0278406	0.0249542	0.0221978
	Spain	ESP	0.0282605	0.0149278	0.037154	0.0267657
	Netherlands	NLD	0.0187251	0.0176987	0.0199633	0.0208684
	Belgium	BEL	0.0112432	0.00965295	0.0124031	0.0121864
	Switzerland	CHE	0.0150248	0.0229715	0.0118486	0.0148196
	Sweden	SWE	0.0120158	0.0122852	0.0115159	0.0117058
	Austria	AUT	0.00914908	0.00827279	0.0100186	0.0102907
	Denmark	DNK	0.00764456	0.00884951	0.00711656	0.00795581
	Norway	NOR	0.00898642	0.0132144	0.00822563	0.0114853
	Ireland	IRL	0.00670932	0.00783982	0.00693171	0.00868081
	Greece	GRC	0.00420857	0.00152161	0.00621081	0.00343764
	Finland	FIN	0.0056521	0.00513346	0.00556385	0.00516028
	New Zealand	NZL	0.00441189	0.0033966	0.00414054	0.00310342
	Portugal	PRT	0.00479818	0.00197782	0.00702413	0.00439692
	Luxembourg	LUX	0.00104503	0.0014942	0.00101665	0.00146699
	Iceland	ISL	0.00048592	0.00055224	0.000391873	0.000372583

## Sheet: Emissions
			Assumptions
			Total 1850	Total 1990	Total 1850 per capita scaled	Total 1990 per capita scaled	Average 1850 1990	Average 1850 1990 per capita
	Description		Cumulative emissions since 1850	Cumulative emissions since 1990	Cumulative emissions since 1850 scaled by per capita emissions	Cumulative emissions since 1990 scaled by per capita emissions	Average cumulative emissions since 1850 and since 1990	Average cumulative emissions since 1850 and since 1990 with per capita scaling
	Countries	ISO Code	Share	Share	Share	Share	Share	Share
	United States	USA	0.499921	0.492263	0.607472	0.607938	0.498004	0.611433
	Japan	JPN	0.0631931	0.10096	0.0258582	0.0681234	0.0726485	0.0346634
	Germany	DEU	0.0951471	0.0784734	0.0874411	0.0613917	0.0909727	0.0810786
	United Kingdom	GBR	0.0843469	0.0516949	0.0859471	0.0333219	0.0761721	0.071096
	France	FRA	0.0465546	0.0384217	0.0257979	0.0181365	0.0445185	0.0239276
	Canada	CAN	0.0486815	0.0535936	0.0493112	0.0616857	0.0499113	0.0525746
	Italy	ITA	0.0282509	0.0386914	0.0109678	0.0212335	0.0308648	0.0132782
	Australia	AUS	0.0397123	0.0442933	0.0490958	0.0630394	0.0408592	0.052715
	Spain	ESP	0.0161455	0.0245931	0.00441412	0.0105708	0.0182605	0.00572696
	Netherlands	NLD	0.0142456	0.0172219	0.00928013	0.013999	0.0149907	0.0104232
	Belgium	BEL	0.0134482	0.0108058	0.0125116	0.00833744	0.0127867	0.0114725
	Switzerland	CHE	0.00378352	0.00404712	0.00131967	0.0015585	0.00384952	0.00138563
	Sweden	SWE	0.00570533	0.00146581	0.00250923	0.000170953	0.00464392	0.0016862
	Austria	AUT	0.00582743	0.00560151	0.00304056	0.00289968	0.00577087	0.00302442
	Denmark	DNK	0.00552461	0.00572804	0.00418717	0.00464588	0.00557554	0.00432565
	Norway	NOR	0.00402243	0.00283565	0.00239857	0.00123033	0.0037253	0.00208669
	Ireland	IRL	0.00501341	0.0055925	0.00396568	0.00509334	0.00515839	0.00425834
	Greece	GRC	0.0054607	0.00870462	0.00232077	0.00608661	0.00627285	0.00310617
	Finland	FIN	0.0039817	0.00362585	0.00230797	0.0019754	0.00389261	0.00223736
	New Zealand	NZL	0.0051574	0.00409837	0.00420494	0.00274069	0.00489226	0.00383776
	Portugal	PRT	0.0037722	0.00534378	0.00110745	0.00229389	0.00416566	0.00136982
	Luxembourg	LUX	0.000761825	0.000856702	0.000719392	0.000938977	0.000785579	0.000775881
	Iceland	ISL	0.00134307	0.00108794	0.0038221	0.00258853	0.00127919	0.00351672

## Sheet: Both
			Assumptions
			Cumulative + GNI	Cumulative + GNI (pc)	Cumulative + GNI (PPP)	Cumulative + GNI (PPP, pc)	Cumulative (pc) + GNI	Cumulative (pc) + GNI (pc)	Cumulative (pc) + GNI (PPP)	Cumulative (pc) + GNI (PPP, pc)
	Description		Cumulative emissions (average of 1850/1990) with total GNI	Cumulative emissions (average of 1850/1990) with total GNI (with per capita scaling)	Cumulative emissions (average of 1850/1990) with total GNI (PPP)	Cumulative emissions (average of 1850/1990) with total GNI (PPP with per capita scaling)	Cumulative emissions (average of 1850/1990 with per capita scaling) with total GNI	Cumulative emissions (average of 1850/1990 with per capita scaling) with total GNI (with per capita scaling)	Cumulative emissions (average of 1850/1990 with per capita scaling) with total GNI (PPP)	Cumulative emissions (average of 1850/1990 with per capita scaling) with total GNI (PPP with per capita scaling)
	Countries	ISO Code	Share	Share	Share	Share	Share	Share	Share	Share
	United States	USA	0.473662	0.519837	0.455105	0.485458	0.530377	0.576552	0.511819	0.542173
	Japan	JPN	0.0897955	0.0771963	0.0890977	0.077624	0.070803	0.0582038	0.0701051	0.0586314
	Germany	DEU	0.0869621	0.0821674	0.0922523	0.0938637	0.0820151	0.0772204	0.0873053	0.0889167
	United Kingdom	GBR	0.0675664	0.0612646	0.0688628	0.0642919	0.0650284	0.0587266	0.0663248	0.0617539
	France	FRA	0.0508247	0.0437014	0.0544224	0.0504583	0.0405293	0.033406	0.044127	0.0401629
	Canada	CAN	0.0429488	0.0398274	0.0430705	0.0405924	0.0442805	0.0411591	0.0444022	0.0419241
	Italy	ITA	0.0363736	0.0287365	0.0414956	0.0368104	0.0275803	0.0199432	0.0327024	0.0280172
	Australia	AUS	0.0346615	0.0343499	0.0329067	0.0315285	0.0405894	0.0402778	0.0388346	0.0374564
	Spain	ESP	0.0232605	0.0165942	0.0277072	0.0225131	0.0169937	0.0103274	0.0214405	0.0162464
	Netherlands	NLD	0.0168579	0.0163447	0.017477	0.0179296	0.0145741	0.0140609	0.0151932	0.0156458
	Belgium	BEL	0.0120149	0.0112198	0.0125949	0.0124865	0.0113578	0.0105627	0.0119378	0.0118294
	Switzerland	CHE	0.00943717	0.0134105	0.00784906	0.00933456	0.00820522	0.0121786	0.00661712	0.00810261
	Sweden	SWE	0.00832985	0.00846454	0.0080799	0.00817487	0.00685099	0.00698568	0.00660104	0.00669601
	Austria	AUT	0.00745997	0.00702183	0.00789475	0.00803079	0.00608675	0.00564861	0.00652153	0.00665756
	Denmark	DNK	0.00661005	0.00721253	0.00634605	0.00676568	0.0059851	0.00658758	0.0057211	0.00614073
	Norway	NOR	0.00635586	0.00846985	0.00597547	0.0076053	0.00553656	0.00765055	0.00515616	0.006786
	Ireland	IRL	0.00593386	0.00649911	0.00604505	0.0069196	0.00548383	0.00604908	0.00559502	0.00646957
	Greece	GRC	0.00524071	0.00389723	0.00624183	0.00485525	0.00365737	0.00231389	0.00465849	0.0032719
	Finland	FIN	0.00477235	0.00451304	0.00472823	0.00452645	0.00394473	0.00368541	0.00390061	0.00369882
	New Zealand	NZL	0.00465207	0.00414443	0.0045164	0.00399784	0.00412482	0.00361718	0.00398915	0.00347059
	Portugal	PRT	0.00448192	0.00307174	0.0055949	0.00428129	0.003084	0.00167382	0.00419698	0.00288337
	Luxembourg	LUX	0.000915303	0.00113989	0.000901115	0.00112628	0.000910454	0.00113504	0.000896266	0.00112144
	Iceland	ISL	0.000882556	0.000915717	0.000835534	0.000825889	0.00200132	0.00203448	0.0019543	0.00194465
